# Supplementary material for: Computational analysis of non-heme iron–oxo formation by direct NO release in nitrite reduction
Source: Royal Society of Chemistry journal article supplement (doi:10.1039/c9cp00370c), 2019-01-01
Supplement: c9cp00370c1.pdf [file c9cp00370c1.pdf]

*Supporting information for*

## **Computational Analysis of a Non-heme Iron-Oxo Formation by Direct NO Release in Nitrite Reduction**

Jian Wang,<sup>\*ac</sup> Yuan-yuan Zhao,<sup>‡d</sup> Po-Heng Lee<sup>c</sup> and Kechen Wu<sup>\*ab</sup>

<sup>a</sup> *State Key Laboratory of Structural Chemistry, Fujian Institute of Research on the Structure of Matter, Chinese Academy of Sciences, Fuzhou 350002, People's Republic of China. E-mail: wangjian@fjirsm.ac.cn (J.W) and wkc@fjirsm.ac.cn (K.W)*

<sup>b</sup> *Center for Advanced Marine Materials and Smart Sensors, Minjiang University, Fuzhou 350116, China*

<sup>c</sup> *Department of Civil and Environmental Engineering, The Hong Kong Polytechnic University, Hung Hom, Kowloon, Hong Kong, People's Republic of China*

<sup>d</sup> *Frankfurt Institute for Advanced Studies (FIAS), Goethe-University, Ruth-Moufang-Str. 1, D-60438 Frankfurt am Main, Germany*

<sup>‡</sup> *Current address: Fuel Cell Cutting-Edge Research Center (FC-Cubic), Technology Research Association, AIST Tokyo Waterfront Main Building, 2-3-26 Aomi, Koto-ku, Tokyo 135-0064, Japan*

## Table and Figure Captions

**Table S1.** The optimized molecular properties ( $\Delta G$  (kcal/mol), bond distances ( $\text{\AA}$ ), and spin,) of 1NHi-ONO (Fe (O)-nitrito-*trans*) and  $P_{3\text{NHi-O}\dots\text{NO}}$  at triplet, quintet, and septet spin states, respectively.

**Fig. S1** Schematic structures for the definition of n N-H bonds inward (nNHi) shown in the arm framework.

**Fig. S2** The bond distances of (Fe) O  $\cdots$  H-N in the Fe (O)-nitrito-*trans* for the nNHi (n = 1-3) intermediates.

**Fig. S3** Scanning (Fe)O-NO bond distance from the intermediate ( ${}^5\text{1NHi-ONO}$ ) to the product-complex ( ${}^5P_{\text{1NHi-O}\dots\text{NO-top}}$ ) at the B3LYP/6-31G (d) level.

**Fig. S4** The molecular structure of the transition state  ${}^5\text{TS}_{\text{1NHi-O}\dots\text{NO}}$ . The bond distance is in angstrom ( $\text{\AA}$ ).

**Fig. S5** Relative free energies ( $\Delta G$ ) and geometry profiles for NO release starting from 1NHi-ONO. The SCF energies ( $\Delta E$ ) including zero point energy and solvation (acetonitrile and water) corrections are listed in square brackets and parenthesis, respectively.

**Fig. S6** Scanning potential energy surfaces for  $0\text{NHi-ONO} \rightarrow 1\text{NHi-ONO}$ ,  $P_{2\text{NHi-O}} \rightarrow P_{3\text{NHi-O}}$  and  $P_{2\text{NHi-OH}} \rightarrow P_{3\text{NHi-OH}}$  calculated at the 6-31G (d) level.

**Page S10-S25: Cartesian Coordinates of Intermediates, Transition States and Product-Complex.**

**Table S1.** The optimized molecular properties ( $\Delta G$  (kcal/mol), bond distances ( $\text{\AA}$ ), and spin,) of 1NHi-ONO (Fe (O)-nitrito-*trans*) and  $P_{3\text{NHi-O...NO}}$  at triplet, quintet, and septet spin states, respectively.

|                                                                                   |                                                                                    | triplet    | quintet | septet |       |
|-----------------------------------------------------------------------------------|------------------------------------------------------------------------------------|------------|---------|--------|-------|
| 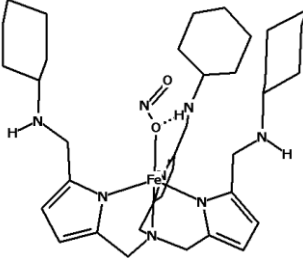 | $\Delta G$                                                                         | 16.48      | 0.00    |        |       |
|                                                                                   | Fe-O                                                                               | 1.960      | 2.078   |        |       |
|                                                                                   | (Fe)O-N                                                                            | 1.325      | 1.319   |        |       |
|                                                                                   | N-O                                                                                | 1.223      | 1.223   |        |       |
|                                                                                   | O-N-O                                                                              | 112.82     | 113.95  |        |       |
|                                                                                   | N-H...O                                                                            | 1.740      | 1.791   |        |       |
|                                                                                   | spin                                                                               | Fe         | 1.92    | 3.72   |       |
|                                                                                   |  | $\Delta G$ | 12.21   | 0.00   | -9.06 |
| Fe-O                                                                              |                                                                                    | 1.754      | 1.745   | 1.780  |       |
| (Fe)O-N                                                                           |                                                                                    | 3.639      | 3.883   | 3.908  |       |
| N-O                                                                               |                                                                                    | 1.159      | 1.160   | 1.159  |       |
| O-N-O                                                                             |                                                                                    | 89.06      | 89.95   | 90.11  |       |
| N-H...O                                                                           |                                                                                    | 1.560      | 1.593   | 1.608  |       |
|                                                                                   |                                                                                    |            | 1.562   | 1.597  | 1.623 |
|                                                                                   |                                                                                    |            | 1.583   | 1.633  | 1.638 |
| spin                                                                              |                                                                                    | Fe         | 0.90    | 2.75   | 4.06  |
|                                                                                   |                                                                                    | (Fe)O      | 0.14    | 0.10   | 0.48  |
|                                                                                   |                                                                                    | N          | 0.78    | 0.73   | 0.73  |
|                                                                                   |                                                                                    | O          | 0.29    | 0.28   | 0.28  |

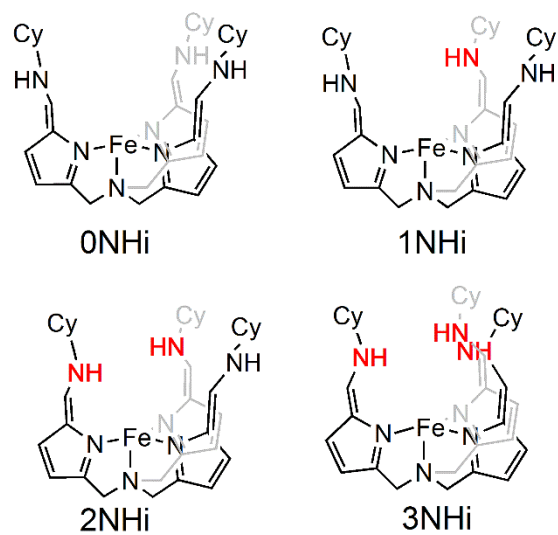

**Fig. S1** Schematic structures for the definition of n N-H bonds inward (nNHi) shown in the arm framework.

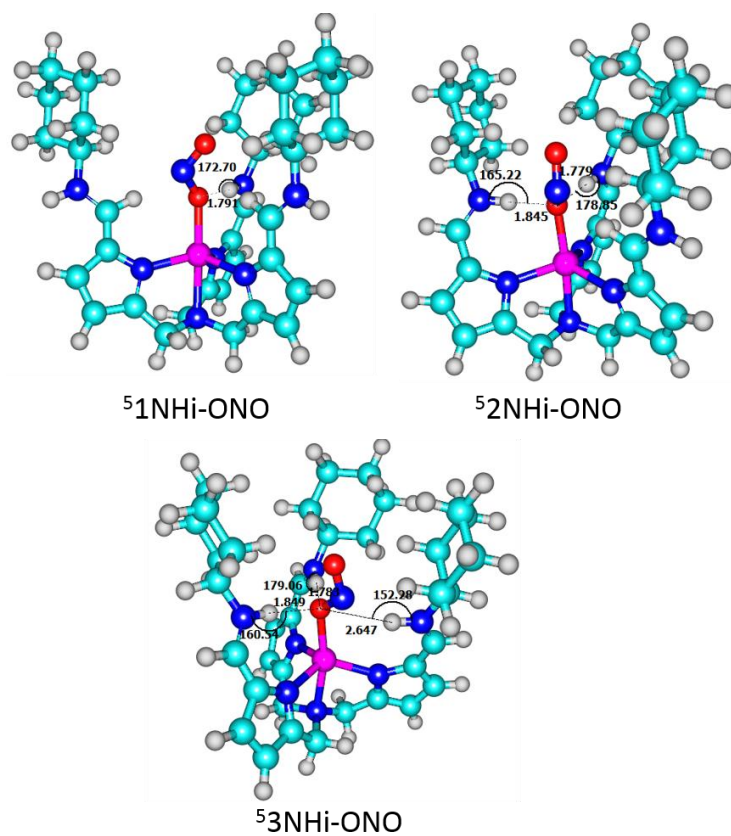

**Fig. S2** The bond distances of (Fe) O ···H-N in the Fe (O)-nitrito-*trans* for the nNHi (n = 1-3) intermediates.

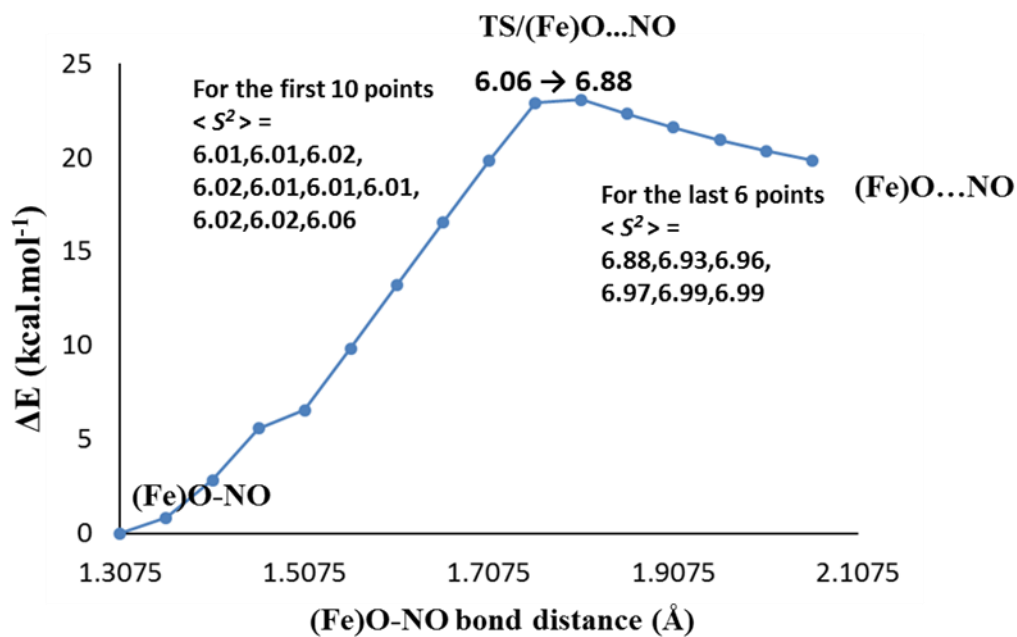

**Fig. S3** Scanning (Fe)O-NO bond distance from the intermediate (<sup>5</sup>1NHi-ONO) to the product-complex (<sup>5</sup>P<sub>1NHi-O...NO-top</sub>) at the B3LYP/6-31G (d) level.

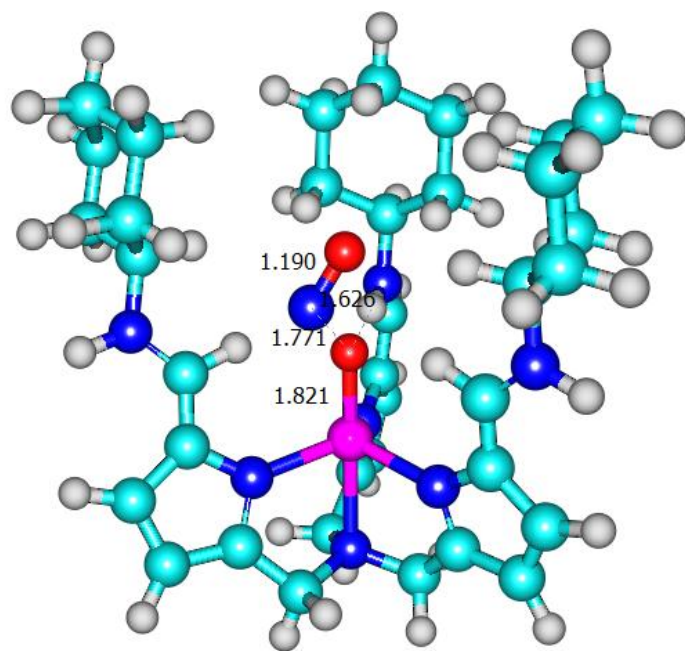

**Fig. S4** The molecular structure of the transition state  ${}^5\text{TS}_{1\text{NHi-O}\dots\text{NO}}$ . The bond distance is in angstrom ( $\text{\AA}$ ).

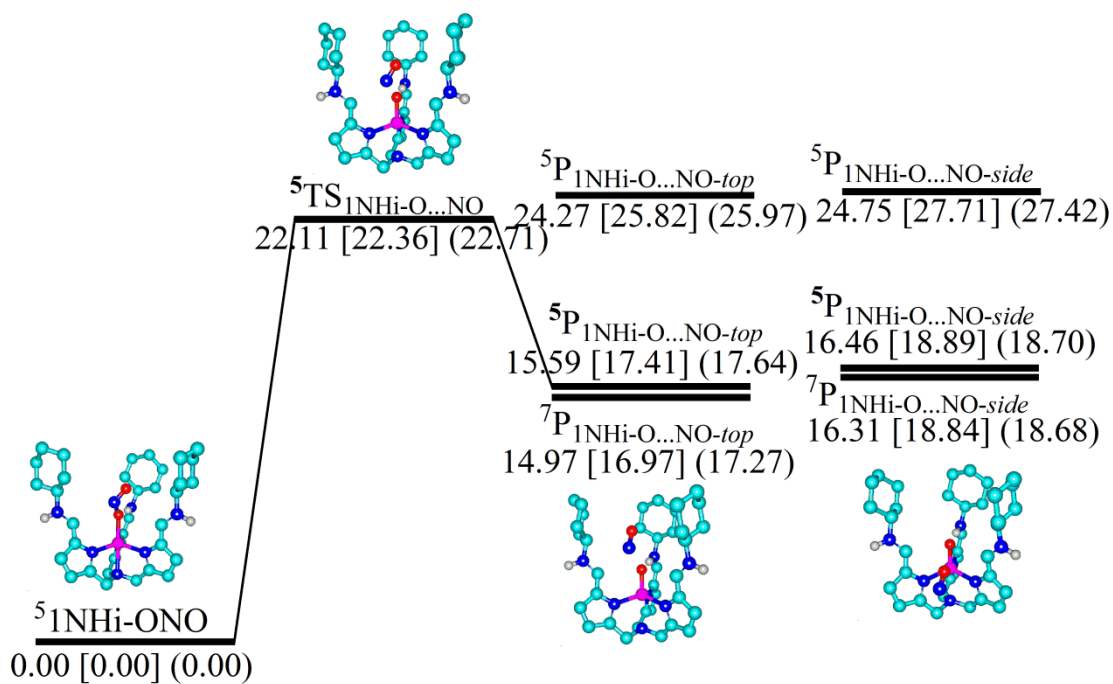

**Fig. S5** Relative free energies ( $\Delta G$ ) and geometry profiles for NO release starting from 1NHi-ONO. The SCF energies ( $\Delta E$ ) including zero point energy and solvation (acetonitrile and water) corrections are listed in square brackets and parenthesis, respectively.



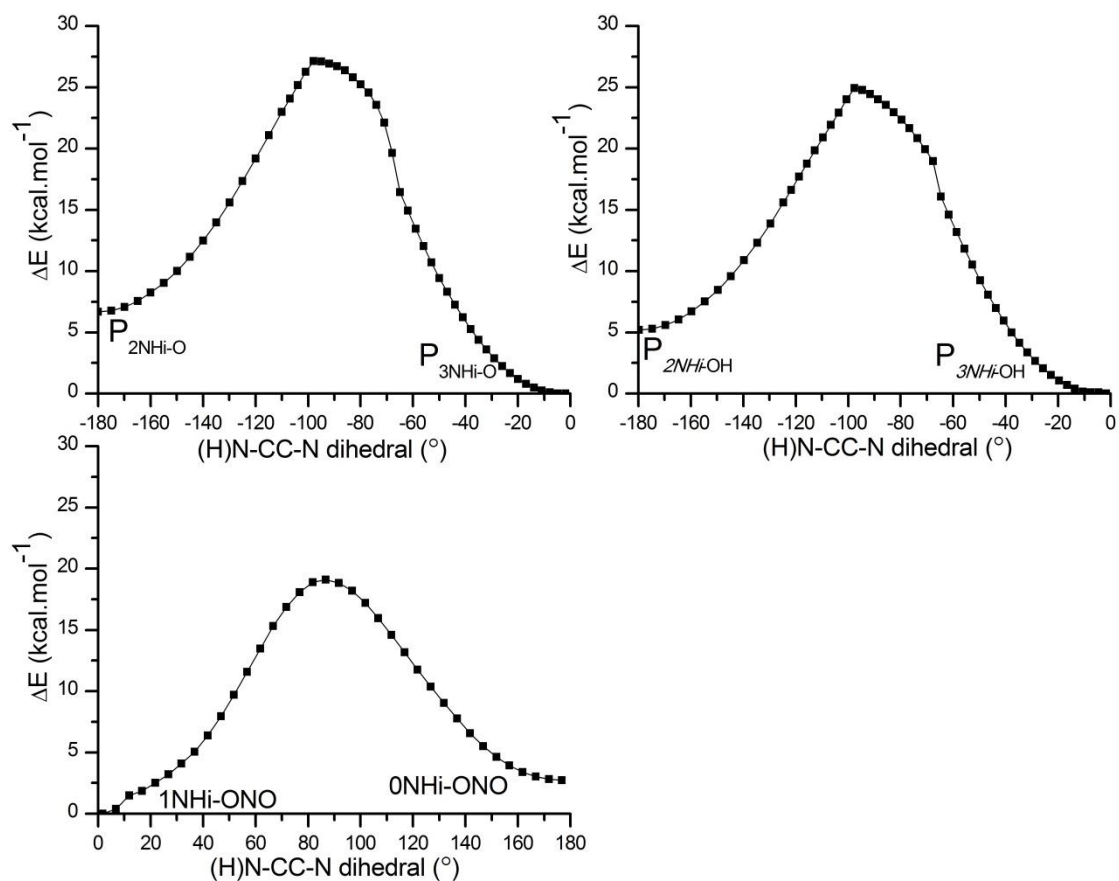

**Fig. S6** Scanning potential energy surfaces for  $0NH_i-ONO \rightarrow 1NH_i-ONO$ ,  $P_{2NH_i-O} \rightarrow P_{3NH_i-O}$  and  $P_{2NH_i-OH} \rightarrow P_{3NH_i-OH}$  calculated at the 6-31G (d) level.

**Cartesian Coordinates of  
Intermediates, Transition States and  
Product-Complex**

<sup>5</sup>  
ONHi-ONO

|    |              |              |              |   |              |              |              |
|----|--------------|--------------|--------------|---|--------------|--------------|--------------|
|    |              |              |              | H | -0.922984000 | -2.353354000 | 0.366109000  |
|    |              |              |              | C | 0.444716000  | 1.680762000  | -2.561521000 |
|    |              |              |              | H | 0.550628000  | 0.830297000  | -1.890310000 |
|    |              |              |              | N | 0.997284000  | 1.920648000  | 3.514337000  |
|    |              |              |              | N | 1.509679000  | 1.918193000  | -3.315936000 |
|    |              |              |              | N | -1.349601000 | -4.340861000 | 0.149585000  |
|    |              |              |              | H | -2.009531000 | -5.047653000 | -0.158941000 |
|    |              |              |              | H | 0.791918000  | 2.519320000  | 4.306458000  |
|    |              |              |              | H | 1.516558000  | 2.718356000  | -3.938902000 |
| Fe | -1.878561000 | 0.525128000  | -0.114653000 | C | 2.410304000  | 1.579522000  | 3.259677000  |
| N  | -4.073221000 | 1.417357000  | -0.250818000 | C | 3.019564000  | 2.498994000  | 2.186238000  |
| C  | -4.798659000 | 0.467220000  | -1.114780000 | C | 3.213353000  | 1.631955000  | 4.564104000  |
| H  | -5.889834000 | 0.546051000  | -0.993269000 | H | 2.417364000  | 0.548244000  | 2.883038000  |
| H  | -4.569854000 | 0.734900000  | -2.153465000 | C | 4.488967000  | 2.131554000  | 1.927612000  |
| C  | -4.547492000 | 1.440455000  | 1.147864000  | H | 2.947508000  | 3.539893000  | 2.530788000  |
| H  | -5.407786000 | 2.112520000  | 1.283734000  | H | 2.430192000  | 2.424336000  | 1.264081000  |
| H  | -4.883781000 | 0.427449000  | 1.397482000  | C | 4.688215000  | 1.276755000  | 4.307685000  |
| C  | -3.947144000 | 2.764251000  | -0.839281000 | H | 3.152437000  | 2.648900000  | 4.980688000  |
| H  | -4.869579000 | 3.080145000  | -1.349030000 | H | 2.773273000  | 0.949702000  | 5.300876000  |
| H  | -3.781527000 | 3.471909000  | -0.018022000 | C | 5.308777000  | 2.176286000  | 3.226720000  |
| C  | -3.409866000 | 1.820199000  | 2.058923000  | H | 4.913053000  | 2.811163000  | 1.179891000  |
| C  | -3.423905000 | 2.534284000  | 3.290707000  | H | 4.537740000  | 1.121228000  | 1.497574000  |
| N  | -2.169305000 | 1.432600000  | 1.741922000  | H | 5.251546000  | 1.356085000  | 5.243471000  |
| C  | -2.110527000 | 2.576667000  | 3.736271000  | H | 4.753799000  | 0.226798000  | 3.990024000  |
| H  | -4.295057000 | 2.953919000  | 3.776478000  | H | 6.343341000  | 1.871983000  | 3.033163000  |
| C  | -1.330587000 | 1.883799000  | 2.765011000  | H | 5.347969000  | 3.211417000  | 3.594106000  |
| H  | -1.751620000 | 3.037299000  | 4.648189000  | C | 0.023854000  | -4.797962000 | 0.434514000  |
| C  | -2.765603000 | 2.832294000  | -1.767375000 | C | -0.004277000 | -6.083239000 | 1.270942000  |
| C  | -2.505698000 | 3.773424000  | -2.802715000 | C | 0.807401000  | -4.987158000 | -0.876102000 |
| N  | -1.734628000 | 1.993217000  | -1.603816000 | H | 0.500076000  | -3.995429000 | 1.009264000  |
| C  | -1.234935000 | 3.491964000  | -3.279402000 | C | 1.423944000  | -6.585963000 | 1.545784000  |
| H  | -3.177214000 | 4.551605000  | -3.141059000 | H | -0.559099000 | -6.857070000 | 0.718490000  |
| C  | -0.756134000 | 2.380502000  | -2.528827000 | H | -0.543080000 | -5.905402000 | 2.208877000  |
| H  | -0.715447000 | 4.004176000  | -4.079616000 | C | 2.232582000  | -5.484915000 | -0.589995000 |
| C  | -4.330357000 | -0.939474000 | -0.857692000 | H | 0.276635000  | -5.717191000 | -1.504732000 |
| C  | -5.026289000 | -2.163190000 | -1.047295000 | H | 0.832056000  | -4.035998000 | -1.418257000 |
| N  | -3.074477000 | -1.156846000 | -0.440024000 | C | 2.216741000  | -6.775625000 | 0.242868000  |
| C  | -4.130334000 | -3.176926000 | -0.737562000 | H | 1.379838000  | -7.523141000 | 2.111289000  |
| H  | -6.053721000 | -2.270028000 | -1.369399000 | H | 1.943315000  | -5.857526000 | 2.184339000  |
| C  | -2.915401000 | -2.544081000 | -0.351808000 | H | 2.763819000  | -5.642641000 | -1.535261000 |
| H  | -4.326235000 | -4.241604000 | -0.761624000 | H | 2.779428000  | -4.701333000 | -0.047830000 |
| C  | 0.023768000  | 1.577602000  | 2.681350000  | H | 3.240346000  | -7.094689000 | 0.469198000  |
| H  | 0.326919000  | 0.959632000  | 1.837811000  | H | 1.758093000  | -7.582782000 | -0.346065000 |
| C  | -1.691424000 | -3.064522000 | 0.069897000  | C | 2.769843000  | 1.164393000  | -3.157345000 |

|   |              |              |              |   |              |              |              |
|---|--------------|--------------|--------------|---|--------------|--------------|--------------|
| C | 3.607064000  | 1.255380000  | -4.437713000 | H | 5.405580000  | -2.309829000 | 0.960085000  |
| C | 3.556248000  | 1.657887000  | -1.929938000 | H | 4.974572000  | -0.613545000 | 0.705965000  |
| H | 2.486167000  | 0.118339000  | -2.988905000 | N | 2.349823000  | -1.266313000 | 1.870243000  |
| C | 4.926283000  | 0.479224000  | -4.279858000 | C | 3.636915000  | -1.657994000 | 2.005225000  |
| H | 3.832165000  | 2.312980000  | -4.644027000 | C | 3.928358000  | -2.059738000 | 3.329599000  |
| H | 3.031009000  | 0.871934000  | -5.288063000 | C | 2.746967000  | -1.909426000 | 4.044216000  |
| C | 4.869824000  | 0.875739000  | -1.775408000 | H | 2.576996000  | -2.126509000 | 5.091382000  |
| H | 3.767907000  | 2.729678000  | -2.052150000 | C | 1.772417000  | -1.419523000 | 3.130159000  |
| H | 2.931859000  | 1.548200000  | -1.035233000 | H | 4.881968000  | -2.417141000 | 3.694198000  |
| C | 5.719460000  | 0.956494000  | -3.053222000 | C | 0.436409000  | -1.181944000 | 3.474105000  |
| H | 5.524718000  | 0.585514000  | -5.190938000 | H | 0.159083000  | -1.408915000 | 4.502311000  |
| H | 4.701542000  | -0.591232000 | -4.174206000 | C | 3.464997000  | -3.354678000 | -0.558511000 |
| H | 5.429136000  | 1.261409000  | -0.916229000 | H | 3.439752000  | -3.793582000 | 0.445853000  |
| H | 4.635654000  | -0.174869000 | -1.553988000 | H | 4.231742000  | -3.899757000 | -1.127549000 |
| H | 6.631294000  | 0.359677000  | -2.940129000 | N | 1.172197000  | -2.572343000 | -0.990353000 |
| H | 6.040524000  | 1.996138000  | -3.210547000 | C | 1.578180000  | -4.625560000 | -1.895488000 |
| N | 0.906885000  | -0.759579000 | -0.542625000 | H | 2.119841000  | -5.518040000 | -2.179851000 |
| O | 1.561495000  | -1.731964000 | -0.198060000 | C | 0.244546000  | -4.335341000 | -2.141326000 |
| O | -0.056854000 | -0.430910000 | 0.288987000  | H | -0.466999000 | -4.963113000 | -2.663099000 |
|   |              |              |              | C | -0.006943000 | -3.056248000 | -1.568340000 |
|   |              |              |              | C | 2.105030000  | -3.516714000 | -1.179432000 |
|   |              |              |              | C | -1.179998000 | -2.312605000 | -1.457603000 |
|   |              |              |              | H | -1.129037000 | -1.376608000 | -0.910616000 |
|   |              |              |              | N | 1.835034000  | 4.079238000  | -0.870738000 |
|   |              |              |              | H | 2.442396000  | 4.592303000  | -1.500941000 |
|   |              |              |              | C | 0.677790000  | 4.811087000  | -0.324432000 |
|   |              |              |              | C | 1.091353000  | 6.238221000  | 0.057587000  |
|   |              |              |              | C | -0.498406000 | 4.802845000  | -1.316735000 |
|   |              |              |              | H | 0.376727000  | 4.273513000  | 0.583679000  |
|   |              |              |              | C | -0.107845000 | 7.025153000  | 0.613269000  |
|   |              |              |              | H | 1.473546000  | 6.748791000  | -0.839473000 |
|   |              |              |              | H | 1.909439000  | 6.206818000  | 0.786590000  |
|   |              |              |              | C | -1.691883000 | 5.589827000  | -0.750891000 |
|   |              |              |              | H | -0.165926000 | 5.261026000  | -2.259234000 |
|   |              |              |              | H | -0.777678000 | 3.766542000  | -1.535682000 |
|   |              |              |              | C | -1.289259000 | 7.022737000  | -0.369418000 |
|   |              |              |              | H | 0.201933000  | 8.050435000  | 0.842470000  |
|   |              |              |              | H | -0.423616000 | 6.573763000  | 1.564561000  |
|   |              |              |              | H | -2.505800000 | 5.599033000  | -1.484014000 |
|   |              |              |              | H | -2.077446000 | 5.069225000  | 0.137471000  |
|   |              |              |              | H | -2.142469000 | 7.553896000  | 0.066955000  |
|   |              |              |              | H | -1.006486000 | 7.573639000  | -1.277673000 |
|   |              |              |              | C | -3.591031000 | -1.822574000 | -1.749167000 |
|   |              |              |              | C | -4.138720000 | -1.361053000 | -3.108604000 |

5  
1NH<sub>i</sub>-ONO

|    |              |              |              |
|----|--------------|--------------|--------------|
| Fe | 1.803006000  | -0.784684000 | -0.096249000 |
| N  | 3.799694000  | -1.923329000 | -0.413902000 |
| N  | 3.035632000  | 0.619044000  | -1.054657000 |
| N  | -0.536314000 | -0.724074000 | 2.711328000  |
| H  | -0.343176000 | -0.435878000 | 1.742198000  |
| N  | -2.375697000 | -2.633628000 | -1.928531000 |
| H  | -2.481833000 | -3.499831000 | -2.446795000 |
| O  | 0.030519000  | 0.273749000  | 0.141290000  |
| N  | -0.705971000 | 1.111566000  | -0.563124000 |
| O  | -1.908835000 | 0.910115000  | -0.474837000 |
| C  | 4.392375000  | -1.343450000 | -1.633949000 |
| H  | 3.914223000  | -1.830534000 | -2.492463000 |
| H  | 5.471966000  | -1.545481000 | -1.705566000 |
| C  | 4.115547000  | 0.132945000  | -1.682357000 |
| C  | 4.832383000  | 1.163381000  | -2.347922000 |
| H  | 5.743450000  | 1.042112000  | -2.918802000 |
| C  | 4.135202000  | 2.339457000  | -2.113170000 |
| H  | 4.402782000  | 3.329270000  | -2.461221000 |
| C  | 3.020099000  | 1.996001000  | -1.297446000 |
| C  | 2.019373000  | 2.775815000  | -0.723979000 |
| H  | 1.301274000  | 2.269876000  | -0.088283000 |
| C  | 4.559423000  | -1.621705000 | 0.817306000  |

|                      |              |              |              |   |              |              |              |
|----------------------|--------------|--------------|--------------|---|--------------|--------------|--------------|
| C                    | -4.644689000 | -2.606770000 | -0.951417000 | H | 4.364590000  | -3.702722000 | 0.825376000  |
| H                    | -3.286550000 | -0.941679000 | -1.174798000 | H | 3.568547000  | -2.728298000 | 2.063339000  |
| C                    | -5.420123000 | -0.530851000 | -2.923152000 | C | 3.708132000  | -0.099709000 | 2.060759000  |
| H                    | -4.359062000 | -2.245422000 | -3.725057000 | C | 4.065795000  | 0.314870000  | 3.364550000  |
| H                    | -3.370515000 | -0.782205000 | -3.633629000 | N | 2.399703000  | 0.124701000  | 1.797948000  |
| C                    | -5.922301000 | -1.770561000 | -0.770677000 | C | 2.904977000  | 0.814273000  | 3.938874000  |
| H                    | -4.887534000 | -3.533031000 | -1.492902000 | H | 5.047730000  | 0.239245000  | 3.811884000  |
| H                    | -4.224973000 | -2.900729000 | 0.017275000  | C | 1.877886000  | 0.696469000  | 2.960419000  |
| C                    | -6.480984000 | -1.303604000 | -2.123645000 | H | 2.782210000  | 1.218530000  | 4.935935000  |
| H                    | -5.813321000 | -0.238235000 | -3.902764000 | C | 2.221337000  | -3.541831000 | 0.634665000  |
| H                    | -5.169250000 | 0.398585000  | -2.393142000 | C | 1.758765000  | -4.874983000 | 0.804209000  |
| H                    | -6.670716000 | -2.354671000 | -0.223645000 | N | 1.259034000  | -2.742787000 | 0.150509000  |
| H                    | -5.692663000 | -0.892894000 | -0.150774000 | C | 0.430692000  | -4.879667000 | 0.410885000  |
| H                    | -7.367854000 | -0.678891000 | -1.970254000 | H | 2.341373000  | -5.711285000 | 1.167368000  |
| H                    | -6.807887000 | -2.178625000 | -2.703040000 | C | 0.122427000  | -3.551937000 | 0.000199000  |
| C                    | -1.924655000 | -0.527869000 | 3.147246000  | H | -0.236221000 | -5.732609000 | 0.393849000  |
| C                    | -2.304064000 | 0.961464000  | 3.056019000  | C | 4.012266000  | -0.715764000 | -1.952480000 |
| C                    | -2.869473000 | -1.396339000 | 2.296532000  | C | 4.778937000  | -0.202104000 | -3.023153000 |
| H                    | -1.985012000 | -0.852525000 | 4.194331000  | N | 2.957933000  | 0.077404000  | -1.656652000 |
| C                    | -3.774622000 | 1.184261000  | 3.445445000  | C | 4.166645000  | 0.986405000  | -3.394282000 |
| H                    | -2.147496000 | 1.293487000  | 2.022071000  | H | 5.671416000  | -0.647922000 | -3.440830000 |
| H                    | -1.635316000 | 1.547361000  | 3.697673000  | C | 3.045705000  | 1.160083000  | -2.534356000 |
| C                    | -4.335437000 | -1.168128000 | 2.697918000  | H | 4.479150000  | 1.677587000  | -4.166925000 |
| H                    | -2.729292000 | -1.118410000 | 1.243947000  | C | 0.555047000  | 1.092940000  | 3.186079000  |
| H                    | -2.590777000 | -2.451726000 | 2.400601000  | H | 0.318705000  | 1.423879000  | 4.196201000  |
| C                    | -4.714042000 | 0.317048000  | 2.593068000  | C | 2.282384000  | 2.331458000  | -2.505721000 |
| H                    | -4.025995000 | 2.245119000  | 3.336674000  | H | 2.566034000  | 3.107293000  | -3.214507000 |
| H                    | -3.914438000 | 0.936216000  | 4.507234000  | C | -1.048469000 | -2.998674000 | -0.504594000 |
| H                    | -4.991235000 | -1.779147000 | 2.068522000  | H | -1.011098000 | -1.959512000 | -0.818022000 |
| H                    | -4.488196000 | -1.511099000 | 3.730909000  | N | -0.446357000 | 1.117729000  | 2.328587000  |
| H                    | -5.754293000 | 0.465809000  | 2.903652000  | N | -2.224563000 | -3.588809000 | -0.667016000 |
| H                    | -4.644171000 | 0.635574000  | 1.543448000  | N | 1.283432000  | 2.633067000  | -1.700373000 |
|                      |              |              |              | H | 0.915497000  | 1.908100000  | -1.078172000 |
|                      |              |              |              | H | -0.270707000 | 0.885923000  | 1.341416000  |
|                      |              |              |              | H | -2.339678000 | -4.555116000 | -0.379295000 |
| 5                    |              |              |              | C | -1.839801000 | 1.439010000  | 2.667155000  |
| <sup>2</sup> NHi-ONO |              |              |              | C | -2.308992000 | 2.686390000  | 1.898615000  |
| Fe                   | 1.779604000  | -0.691142000 | -0.061479000 | C | -2.734648000 | 0.224736000  | 2.356828000  |
| N                    | 3.795380000  | -1.718420000 | 0.249892000  | H | -1.871850000 | 1.642195000  | 3.745459000  |
| C                    | 4.274803000  | -1.943162000 | -1.127333000 | C | -3.791490000 | 2.986562000  | 2.171397000  |
| H                    | 5.342862000  | -2.206468000 | -1.156675000 | H | -2.165929000 | 2.499817000  | 0.827605000  |
| H                    | 3.715123000  | -2.796654000 | -1.528113000 | H | -1.681279000 | 3.542117000  | 2.173602000  |
| C                    | 4.585700000  | -0.733842000 | 1.016826000  | C | -4.214450000 | 0.534726000  | 2.630807000  |
| H                    | 5.475751000  | -1.186375000 | 1.477401000  | H | -2.608580000 | -0.024482000 | 1.295376000  |
| H                    | 4.934305000  | 0.030746000  | 0.314451000  |   |              |              |              |
| C                    | 3.561888000  | -2.969571000 | 0.993877000  |   |              |              |              |

|   |              |              |              |    |              |              |              |
|---|--------------|--------------|--------------|----|--------------|--------------|--------------|
| H | -2.395784000 | -0.638916000 | 2.941340000  | O  | 0.042015000  | 0.452003000  | -0.355223000 |
| C | -4.675836000 | 1.772691000  | 1.846842000  |    |              |              |              |
| H | -4.100788000 | 3.857328000  | 1.582329000  |    |              |              |              |
| H | -3.923076000 | 3.260720000  | 3.227787000  |    |              |              |              |
| H | -4.826964000 | -0.336095000 | 2.371243000  | Fe | 1.788056000  | -0.342536000 | -0.032914000 |
| H | -4.358132000 | 0.708030000  | 3.706603000  | N  | 4.012762000  | -0.609991000 | 0.114900000  |
| H | -5.724305000 | 1.995754000  | 2.073481000  | C  | 4.430902000  | -0.840628000 | -1.282195000 |
| H | -4.618890000 | 1.560147000  | 0.769996000  | H  | 5.521470000  | -0.764767000 | -1.406082000 |
| C | 0.554048000  | 3.909953000  | -1.700429000 | H  | 4.140322000  | -1.865081000 | -1.542424000 |
| C | -0.811075000 | 3.755327000  | -2.392459000 | C  | 4.514629000  | 0.650219000  | 0.702771000  |
| C | 0.403918000  | 4.404857000  | -0.252278000 | H  | 5.539133000  | 0.543128000  | 1.087077000  |
| H | 1.164667000  | 4.627536000  | -2.263454000 | H  | 4.538204000  | 1.403329000  | -0.091670000 |
| C | -1.618103000 | 5.061248000  | -2.324959000 | C  | 4.237224000  | -1.767069000 | 0.994895000  |
| H | -1.367350000 | 2.954790000  | -1.890874000 | H  | 5.236703000  | -2.204230000 | 0.852029000  |
| H | -0.658762000 | 3.439328000  | -3.431400000 | H  | 4.188851000  | -1.409964000 | 2.030390000  |
| C | -0.429801000 | 5.694863000  | -0.181171000 | C  | 3.577656000  | 1.089162000  | 1.793880000  |
| H | -0.090793000 | 3.616996000  | 0.329701000  | C  | 3.895273000  | 1.748008000  | 3.004668000  |
| H | 1.396215000  | 4.555288000  | 0.188635000  | N  | 2.252794000  | 0.838913000  | 1.684328000  |
| C | -1.792336000 | 5.528213000  | -0.872009000 | C  | 2.694170000  | 1.900164000  | 3.683852000  |
| H | -2.593088000 | 4.913387000  | -2.802128000 | H  | 4.882196000  | 2.051271000  | 3.327255000  |
| H | -1.103030000 | 5.844036000  | -2.899875000 | C  | 1.680818000  | 1.339898000  | 2.856782000  |
| H | -0.560375000 | 5.987179000  | 0.867076000  | H  | 2.536647000  | 2.354575000  | 4.654047000  |
| H | 0.123844000  | 6.511613000  | -0.665113000 | C  | 3.173289000  | -2.802906000 | 0.788797000  |
| H | -2.348956000 | 6.471384000  | -0.839002000 | C  | 3.270192000  | -4.172048000 | 1.122459000  |
| H | -2.390361000 | 4.786571000  | -0.323859000 | N  | 1.953483000  | -2.470161000 | 0.301430000  |
| C | -3.440170000 | -2.874265000 | -1.094739000 | C  | 2.032580000  | -4.718823000 | 0.833047000  |
| C | -4.183890000 | -3.662661000 | -2.180696000 | H  | 4.143055000  | -4.670740000 | 1.521439000  |
| C | -4.348411000 | -2.583311000 | 0.112365000  | C  | 1.222980000  | -3.667957000 | 0.313098000  |
| H | -3.099731000 | -1.921025000 | -1.516265000 | H  | 1.723252000  | -5.750682000 | 0.943814000  |
| C | -5.455182000 | -2.913474000 | -2.617630000 | C  | 3.728198000  | 0.150455000  | -2.166132000 |
| H | -4.460960000 | -4.649280000 | -1.779660000 | C  | 4.192243000  | 0.748158000  | -3.360145000 |
| H | -3.518833000 | -3.834333000 | -3.034513000 | N  | 2.528131000  | 0.641959000  | -1.784447000 |
| C | -5.610677000 | -1.825971000 | -0.329618000 | C  | 3.228800000  | 1.680555000  | -3.717774000 |
| H | -4.633324000 | -3.536185000 | 0.581674000  | H  | 5.124993000  | 0.531567000  | -3.862935000 |
| H | -3.786531000 | -2.012529000 | 0.859367000  | C  | 2.208121000  | 1.623116000  | -2.726372000 |
| C | -6.367678000 | -2.599279000 | -1.421094000 | H  | 3.247355000  | 2.358209000  | -4.562154000 |
| H | -5.992354000 | -3.507108000 | -3.364991000 | C  | 0.326441000  | 1.299955000  | 3.204371000  |
| H | -5.165405000 | -1.975087000 | -3.110902000 | H  | 0.067188000  | 1.622193000  | 4.211498000  |
| H | -6.257890000 | -1.648902000 | 0.536677000  | C  | 1.195375000  | 2.582635000  | -2.623031000 |
| H | -5.319429000 | -0.837830000 | -0.712976000 | H  | 1.180061000  | 3.352626000  | -3.392238000 |
| H | -7.240386000 | -2.026659000 | -1.753740000 | C  | -0.061061000 | -3.938001000 | -0.168308000 |
| H | -6.749896000 | -3.539429000 | -0.998748000 | H  | -0.405212000 | -4.957914000 | -0.004315000 |
| N | -0.970535000 | 0.078533000  | -1.135073000 | N  | -0.679093000 | 0.915909000  | 2.443246000  |
| O | -1.945420000 | 0.797977000  | -1.055970000 | N  | -0.915801000 | -3.166098000 | -0.808740000 |

5  
3NH<sub>2</sub>-ONO

|   |              |              |              |    |              |              |              |
|---|--------------|--------------|--------------|----|--------------|--------------|--------------|
| N | 0.288302000  | 2.705134000  | -1.674363000 | H  | -3.056711000 | -3.361757000 | 0.836811000  |
| H | 0.195100000  | 1.953665000  | -0.986933000 | C  | -4.041752000 | -3.553250000 | -2.990868000 |
| H | -0.492765000 | 0.682654000  | 1.461998000  | H  | -2.508812000 | -2.054162000 | -2.680078000 |
| H | -0.690139000 | -2.187290000 | -1.006464000 | H  | -1.880879000 | -3.585190000 | -3.305562000 |
| C | -2.071534000 | 0.731183000  | 2.872210000  | C  | -5.068100000 | -2.992494000 | -1.993851000 |
| C | -3.008558000 | 1.619948000  | 2.035560000  | H  | -5.445529000 | -2.985561000 | 0.152800000  |
| C | -2.433312000 | -0.760519000 | 2.738356000  | H  | -4.843854000 | -4.517753000 | -0.470442000 |
| H | -2.132303000 | 1.026662000  | 3.927383000  | H  | -4.263632000 | -3.207462000 | -4.006230000 |
| C | -4.485205000 | 1.345061000  | 2.361968000  | H  | -4.114937000 | -4.649985000 | -3.010545000 |
| H | -2.826405000 | 1.413646000  | 0.973216000  | H  | -6.077645000 | -3.319841000 | -2.265744000 |
| H | -2.761503000 | 2.673676000  | 2.210030000  | H  | -5.062799000 | -1.894769000 | -2.048640000 |
| C | -3.915982000 | -1.023412000 | 3.042672000  | N  | -1.063462000 | -0.316738000 | -1.023879000 |
| H | -2.214145000 | -1.071874000 | 1.709201000  | O  | -2.134290000 | 0.244523000  | -1.124745000 |
| H | -1.784734000 | -1.351753000 | 3.395390000  | O  | -0.185237000 | 0.299679000  | -0.252469000 |
| C | -4.828809000 | -0.140679000 | 2.178647000  |    |              |              |              |
| H | -5.120705000 | 1.969486000  | 1.724191000  |    |              |              |              |
| H | -4.694634000 | 1.641985000  | 3.399382000  | Fe | -1.965460000 | 0.158951000  | -0.028935000 |
| H | -4.138396000 | -2.084391000 | 2.881124000  | N  | -4.351311000 | 0.330361000  | -0.149568000 |
| H | -4.113014000 | -0.821455000 | 4.104756000  | N  | -2.576268000 | -1.340503000 | -1.322999000 |
| H | -5.879441000 | -0.321369000 | 2.431247000  | N  | 0.428116000  | -0.278095000 | 2.554152000  |
| H | -4.704112000 | -0.412640000 | 1.120879000  | H  | 0.217839000  | -0.113621000 | 1.535677000  |
| C | -0.684927000 | 3.803997000  | -1.571321000 | N  | 0.777053000  | 3.951876000  | -1.202521000 |
| C | -2.016935000 | 3.441917000  | -2.250605000 | H  | 0.486985000  | 4.905340000  | -1.394048000 |
| C | -0.880221000 | 4.144734000  | -0.084949000 | O  | -0.146701000 | 0.068015000  | -0.038194000 |
| H | -0.245017000 | 4.670956000  | -2.081574000 | N  | 1.107679000  | -0.236893000 | -1.250107000 |
| C | -3.053955000 | 4.559996000  | -2.059695000 | O  | 2.143700000  | 0.230790000  | -0.896438000 |
| H | -2.389399000 | 2.510323000  | -1.810307000 | C  | -4.703537000 | -0.151525000 | -1.501974000 |
| H | -1.841443000 | 3.246962000  | -3.315654000 | H  | -4.542482000 | 0.680492000  | -2.197984000 |
| C | -1.936527000 | 5.243997000  | 0.106646000  | H  | -5.763089000 | -0.438682000 | -1.575590000 |
| H | -1.204538000 | 3.234192000  | 0.435473000  | C  | -3.801467000 | -1.297987000 | -1.865984000 |
| H | 0.079532000  | 4.442245000  | 0.353663000  | C  | -4.007673000 | -2.399748000 | -2.734999000 |
| C | -3.264644000 | 4.871789000  | -0.570003000 | H  | -4.907548000 | -2.612043000 | -3.296932000 |
| H | -3.999114000 | 4.266234000  | -2.529279000 | C  | -2.833476000 | -3.145787000 | -2.712273000 |
| H | -2.716675000 | 5.469595000  | -2.577085000 | H  | -2.643095000 | -4.065743000 | -3.250564000 |
| H | -2.084925000 | 5.425327000  | 1.177425000  | C  | -1.945211000 | -2.483674000 | -1.822839000 |
| H | -1.562473000 | 6.185614000  | -0.319034000 | C  | -0.667131000 | -2.779624000 | -1.349750000 |
| H | -3.990346000 | 5.683813000  | -0.450024000 | H  | -0.253368000 | -2.081433000 | -0.628037000 |
| H | -3.690528000 | 3.988155000  | -0.073081000 | C  | -4.816741000 | -0.562964000 | 0.931248000  |
| C | -2.281163000 | -3.582523000 | -1.176097000 | H  | -5.845868000 | -0.332506000 | 1.241946000  |
| C | -3.306431000 | -3.019707000 | -0.174801000 | H  | -4.820785000 | -1.584398000 | 0.533686000  |
| C | -2.607619000 | -3.145421000 | -2.612916000 | N  | -2.547110000 | -0.331404000 | 1.891639000  |
| H | -2.299614000 | -4.679188000 | -1.124777000 | C  | -3.875770000 | -0.507997000 | 2.102213000  |
| C | -4.737252000 | -3.427197000 | -0.557576000 | C  | -4.157389000 | -0.721890000 | 3.465971000  |
| H | -3.230158000 | -1.926313000 | -0.181338000 | C  | -2.929600000 | -0.690032000 | 4.124219000  |

<sup>5</sup>TS<sub>INH-O...NO</sub>

|   |              |              |              |                                            |              |              |              |
|---|--------------|--------------|--------------|--------------------------------------------|--------------|--------------|--------------|
| H | -2.746968000 | -0.824652000 | 5.182997000  | H                                          | 2.639675000  | 5.149571000  | 0.382624000  |
| C | -1.937003000 | -0.451607000 | 3.139896000  | H                                          | 2.298171000  | 3.528501000  | 0.995607000  |
| H | -5.134720000 | -0.887696000 | 3.898682000  | C                                          | 5.056263000  | 4.515774000  | -0.908787000 |
| C | -0.555433000 | -0.436848000 | 3.407847000  | H                                          | 4.940852000  | 4.711304000  | -3.075143000 |
| H | -0.270898000 | -0.599362000 | 4.447213000  | H                                          | 4.624319000  | 3.086761000  | -2.477093000 |
| C | -4.700372000 | 1.746264000  | 0.076351000  | H                                          | 4.742383000  | 4.090149000  | 1.204761000  |
| H | -4.809971000 | 1.893506000  | 1.157473000  | H                                          | 4.487621000  | 2.708565000  | 0.141721000  |
| H | -5.664242000 | 2.010440000  | -0.382037000 | H                                          | 6.123704000  | 4.269111000  | -0.894792000 |
| N | -2.339207000 | 2.165834000  | -0.450990000 | H                                          | 4.981651000  | 5.601611000  | -0.755017000 |
| C | -3.639120000 | 4.007875000  | -0.775499000 | C                                          | 1.853445000  | -0.382972000 | 2.881057000  |
| H | -4.525125000 | 4.626389000  | -0.830709000 | C                                          | 2.462326000  | -1.576901000 | 2.118601000  |
| C | -2.327749000 | 4.388681000  | -1.029327000 | C                                          | 2.573142000  | 0.929022000  | 2.521832000  |
| H | -1.989148000 | 5.372117000  | -1.330927000 | H                                          | 1.938734000  | -0.561526000 | 3.961481000  |
| C | -1.518632000 | 3.238298000  | -0.822316000 | C                                          | 3.978080000  | -1.679393000 | 2.348006000  |
| C | -3.595334000 | 2.636647000  | -0.415687000 | H                                          | 2.267479000  | -1.428846000 | 1.049686000  |
| C | -0.138553000 | 3.047524000  | -0.893444000 | H                                          | 1.954835000  | -2.500360000 | 2.423744000  |
| H | 0.225724000  | 2.049612000  | -0.657203000 | C                                          | 4.087001000  | 0.815477000  | 2.760909000  |
| N | 0.119580000  | -3.792497000 | -1.672275000 | H                                          | 2.384559000  | 1.141330000  | 1.462587000  |
| H | -0.177851000 | -4.454984000 | -2.381140000 | H                                          | 2.143486000  | 1.751714000  | 3.105686000  |
| C | 1.496307000  | -3.920021000 | -1.162549000 | C                                          | 4.686431000  | -0.365740000 | 1.981825000  |
| C | 1.785443000  | -5.353519000 | -0.699876000 | H                                          | 4.381030000  | -2.511809000 | 1.758894000  |
| C | 2.520436000  | -3.441285000 | -2.204064000 | H                                          | 4.174337000  | -1.919134000 | 3.402554000  |
| H | 1.550813000  | -3.254571000 | -0.293490000 | H                                          | 4.573929000  | 1.753142000  | 2.472563000  |
| C | 3.213942000  | -5.453436000 | -0.135677000 | H                                          | 4.279530000  | 0.679804000  | 3.834647000  |
| H | 1.680992000  | -6.036335000 | -1.556100000 | H                                          | 5.760562000  | -0.446741000 | 2.182653000  |
| H | 1.047224000  | -5.658554000 | 0.050808000  | H                                          | 4.573188000  | -0.182785000 | 0.904260000  |
| C | 3.944566000  | -3.538088000 | -1.632358000 |                                            |              |              |              |
| H | 2.436912000  | -4.069794000 | -3.102395000 |                                            |              |              |              |
| H | 2.284151000  | -2.413428000 | -2.497517000 | <sup>55</sup> P <sub>INHI-O...NO-top</sub> |              |              |              |
| C | 4.259487000  | -4.962913000 | -1.149903000 | Fe                                         | 1.938103000  | -0.202694000 | -0.034056000 |
| H | 3.420720000  | -6.486803000 | 0.162612000  | N                                          | 4.346842000  | -0.567173000 | -0.265601000 |
| H | 3.279393000  | -4.844071000 | 0.777438000  | N                                          | 2.612365000  | 1.218747000  | -1.377920000 |
| H | 4.668872000  | -3.217641000 | -2.389009000 | N                                          | -0.270187000 | -0.003344000 | 2.643180000  |
| H | 4.038390000  | -2.835757000 | -0.791502000 | H                                          | -0.096754000 | 0.033334000  | 1.580301000  |
| H | 5.260528000  | -5.000447000 | -0.705781000 | N                                          | -1.158714000 | -3.578508000 | -1.285273000 |
| H | 4.273349000  | -5.642678000 | -2.013511000 | H                                          | -0.983664000 | -4.535139000 | -1.576651000 |
| C | 2.227141000  | 3.691610000  | -1.161629000 | O                                          | 0.196896000  | 0.064801000  | 0.082402000  |
| C | 2.934107000  | 4.423914000  | -2.309266000 | N                                          | -1.623843000 | 0.323190000  | -1.603984000 |
| C | 2.818793000  | 4.079655000  | 0.204310000  | O                                          | -2.615961000 | 0.435255000  | -1.003066000 |
| H | 2.346159000  | 2.611652000  | -1.299376000 | C                                          | 4.698478000  | -0.040935000 | -1.598220000 |
| C | 4.448148000  | 4.152012000  | -2.272604000 | H                                          | 4.482949000  | -0.827655000 | -2.331250000 |
| H | 2.756342000  | 5.505623000  | -2.209674000 | H                                          | 5.769307000  | 0.197760000  | -1.682174000 |
| H | 2.506433000  | 4.110514000  | -3.268535000 | C                                          | 3.846956000  | 1.161209000  | -1.897861000 |
| C | 4.328554000  | 3.792070000  | 0.234883000  | C                                          | 4.109081000  | 2.298587000  | -2.703970000 |
|   |              |              |              | H                                          | 5.025231000  | 2.503540000  | -3.241869000 |

|   |              |              |              |                                                             |              |              |              |
|---|--------------|--------------|--------------|-------------------------------------------------------------|--------------|--------------|--------------|
| C | 2.962588000  | 3.084782000  | -2.662574000 | H                                                           | -3.861596000 | 6.286513000  | -1.915269000 |
| H | 2.810851000  | 4.030513000  | -3.167619000 | H                                                           | -4.056839000 | 4.542844000  | -1.785716000 |
| C | 2.029175000  | 2.405320000  | -1.833899000 | H                                                           | -4.571895000 | 5.593461000  | 0.399916000  |
| C | 0.725894000  | 2.696196000  | -1.430956000 | H                                                           | -3.011542000 | 6.408211000  | 0.415264000  |
| H | 0.238315000  | 1.935525000  | -0.817579000 | C                                                           | -2.563788000 | -3.142481000 | -1.267003000 |
| C | 4.913422000  | 0.224893000  | 0.844120000  | C                                                           | -3.138183000 | -3.103205000 | -2.691751000 |
| H | 5.937347000  | -0.087631000 | 1.096561000  | C                                                           | -3.398981000 | -4.037514000 | -0.339351000 |
| H | 4.968628000  | 1.266323000  | 0.505314000  | H                                                           | -2.558890000 | -2.125956000 | -0.862411000 |
| N | 2.671960000  | 0.074038000  | 1.875707000  | C                                                           | -4.610658000 | -2.659948000 | -2.675437000 |
| C | 4.016781000  | 0.146849000  | 2.047195000  | H                                                           | -3.061713000 | -4.107165000 | -3.134543000 |
| C | 4.356986000  | 0.198391000  | 3.411426000  | H                                                           | -2.531325000 | -2.430666000 | -3.308660000 |
| C | 3.151275000  | 0.157636000  | 4.113410000  | C                                                           | -4.870641000 | -3.589332000 | -0.333449000 |
| H | 3.015020000  | 0.174997000  | 5.187496000  | H                                                           | -3.334193000 | -5.078099000 | -0.689769000 |
| C | 2.114042000  | 0.082746000  | 3.152392000  | H                                                           | -2.976303000 | -4.010182000 | 0.671755000  |
| H | 5.356961000  | 0.257928000  | 3.819457000  | C                                                           | -5.454568000 | -3.554069000 | -1.753928000 |
| C | 0.741295000  | 0.024080000  | 3.473095000  | H                                                           | -5.009577000 | -2.670768000 | -3.695534000 |
| H | 0.503630000  | 0.003712000  | 4.537350000  | H                                                           | -4.668427000 | -1.619612000 | -2.325057000 |
| C | 4.561126000  | -2.019463000 | -0.126961000 | H                                                           | -5.455754000 | -4.255969000 | 0.309508000  |
| H | 4.682380000  | -2.237062000 | 0.940941000  | H                                                           | -4.937627000 | -2.585967000 | 0.109325000  |
| H | 5.481533000  | -2.352367000 | -0.628274000 | H                                                           | -6.490555000 | -3.198688000 | -1.726815000 |
| N | 2.155385000  | -2.183142000 | -0.593575000 | H                                                           | -5.481698000 | -4.574380000 | -2.161720000 |
| C | 3.251903000  | -4.116594000 | -1.069802000 | C                                                           | -1.673821000 | -0.108838000 | 3.041269000  |
| H | 4.068071000  | -4.815991000 | -1.194077000 | C                                                           | -2.456358000 | 1.100400000  | 2.497223000  |
| C | 1.900574000  | -4.350929000 | -1.296500000 | C                                                           | -2.257921000 | -1.433674000 | 2.512999000  |
| H | 1.456183000  | -5.276787000 | -1.640130000 | H                                                           | -1.722468000 | -0.108715000 | 4.139128000  |
| C | 1.217766000  | -3.141812000 | -0.993605000 | C                                                           | -3.959473000 | 0.979389000  | 2.790540000  |
| C | 3.359961000  | -2.771880000 | -0.630113000 | H                                                           | -2.294267000 | 1.152860000  | 1.413788000  |
| C | -0.134053000 | -2.795738000 | -0.986634000 | H                                                           | -2.046427000 | 2.021600000  | 2.927421000  |
| H | -0.366652000 | -1.772260000 | -0.683150000 | C                                                           | -3.759026000 | -1.543476000 | 2.818158000  |
| N | 0.014290000  | 3.774997000  | -1.713923000 | H                                                           | -2.096158000 | -1.466855000 | 1.427406000  |
| H | 0.425292000  | 4.516606000  | -2.270197000 | H                                                           | -1.703769000 | -2.274471000 | 2.946549000  |
| C | -1.373295000 | 3.962217000  | -1.238164000 | C                                                           | -4.529895000 | -0.341704000 | 2.250886000  |
| C | -1.428724000 | 4.086077000  | 0.294250000  | H                                                           | -4.487624000 | 1.834251000  | 2.353464000  |
| C | -1.996287000 | 5.184147000  | -1.921283000 | H                                                           | -4.126210000 | 1.030276000  | 3.875758000  |
| H | -1.934025000 | 3.067857000  | -1.537163000 | H                                                           | -4.151655000 | -2.482096000 | 2.411552000  |
| C | -2.879119000 | 4.277371000  | 0.763780000  | H                                                           | -3.907494000 | -1.590350000 | 3.906050000  |
| H | -0.817459000 | 4.946124000  | 0.599925000  | H                                                           | -5.594992000 | -0.423686000 | 2.494971000  |
| H | -0.989115000 | 3.194612000  | 0.755287000  | H                                                           | -4.451866000 | -0.346096000 | 1.154216000  |
| C | -3.444606000 | 5.389628000  | -1.445132000 |                                                             |              |              |              |
| H | -1.400460000 | 6.075103000  | -1.672462000 |                                                             |              |              |              |
| H | -1.964627000 | 5.061410000  | -3.011059000 | <sup>7</sup> P <sub>INH<sub>i</sub>-O...NO-<i>top</i></sub> | 1.995707000  | -0.094829000 | -0.042079000 |
| C | -3.526748000 | 5.494877000  | 0.086096000  | Fe                                                          | 4.409365000  | -0.244656000 | -0.344014000 |
| H | -2.902615000 | 4.384609000  | 1.853941000  | N                                                           | 2.497628000  | 1.398391000  | -1.375663000 |
| H | -3.457248000 | 3.373368000  | 0.525504000  | N                                                           | -0.177772000 | 0.110539000  | 2.659098000  |



|   |              |              |              |   |              |              |              |
|---|--------------|--------------|--------------|---|--------------|--------------|--------------|
| H | -0.014483000 | 0.074615000  | 1.592690000  | C | -1.905063000 | 4.937719000  | -0.111845000 |
| N | -0.847006000 | -3.722843000 | -1.147120000 | C | -2.769435000 | 3.695160000  | -2.153796000 |
| H | -0.609802000 | -4.675798000 | -1.404552000 | H | -1.824184000 | 2.811663000  | -0.436795000 |
| O | 0.240364000  | 0.021102000  | 0.103087000  | C | -3.324805000 | 4.946585000  | 0.480559000  |
| N | -1.570220000 | 0.143663000  | -1.637947000 | H | -1.740895000 | 5.858448000  | -0.690391000 |
| O | -2.575761000 | 0.226357000  | -1.054426000 | H | -1.149208000 | 4.914871000  | 0.681629000  |
| C | 4.669078000  | 0.316396000  | -1.685200000 | C | -4.187381000 | 3.704936000  | -1.557920000 |
| H | 4.499050000  | -0.484484000 | -2.414848000 | H | -2.633294000 | 4.577016000  | -2.796847000 |
| H | 5.711970000  | 0.646938000  | -1.802075000 | H | -2.612332000 | 2.809162000  | -2.778803000 |
| C | 3.706832000  | 1.441626000  | -1.952433000 | C | -4.395262000 | 4.905799000  | -0.621456000 |
| C | 3.829196000  | 2.588307000  | -2.778100000 | H | -3.455708000 | 5.831306000  | 1.112932000  |
| H | 4.697932000  | 2.869084000  | -3.358709000 | H | -3.442854000 | 4.071318000  | 1.135681000  |
| C | 2.618922000  | 3.270169000  | -2.690146000 | H | -4.927273000 | 3.713661000  | -2.365590000 |
| H | 2.362734000  | 4.195278000  | -3.191179000 | H | -4.342650000 | 2.772009000  | -0.997541000 |
| C | 1.789707000  | 2.522898000  | -1.811510000 | H | -5.395131000 | 4.867982000  | -0.174889000 |
| C | 0.490659000  | 2.695351000  | -1.330882000 | H | -4.347681000 | 5.834695000  | -1.207010000 |
| H | 0.126901000  | 1.906951000  | -0.668269000 | C | -2.279356000 | -3.390543000 | -1.093809000 |
| C | 4.938898000  | 0.590727000  | 0.753147000  | C | -2.928764000 | -3.590785000 | -2.472073000 |
| H | 5.988610000  | 0.356524000  | 0.982450000  | C | -2.994942000 | -4.202901000 | -0.003366000 |
| H | 4.908273000  | 1.632255000  | 0.411833000  | H | -2.332425000 | -2.329581000 | -0.830828000 |
| N | 2.737726000  | 0.290825000  | 1.840856000  | C | -4.427430000 | -3.249554000 | -2.425094000 |
| C | 4.078167000  | 0.458198000  | 1.978591000  | H | -2.801260000 | -4.640024000 | -2.777005000 |
| C | 4.441843000  | 0.571931000  | 3.332955000  | H | -2.408473000 | -2.973043000 | -3.212838000 |
| C | 3.255280000  | 0.478829000  | 4.062839000  | C | -4.492888000 | -3.853915000 | 0.033360000  |
| H | 3.140071000  | 0.526208000  | 5.138485000  | H | -2.872970000 | -5.275176000 | -0.214793000 |
| C | 2.205424000  | 0.308178000  | 3.128411000  | H | -2.522378000 | -4.008422000 | 0.966445000  |
| H | 5.443471000  | 0.710553000  | 3.717051000  | C | -5.152188000 | -4.059233000 | -1.338943000 |
| C | 0.839631000  | 0.217393000  | 3.474639000  | H | -4.877441000 | -3.430144000 | -3.407237000 |
| H | 0.615379000  | 0.255522000  | 4.541403000  | H | -4.543650000 | -2.176382000 | -2.216769000 |
| C | 4.760591000  | -1.672379000 | -0.221233000 | H | -4.993417000 | -4.458171000 | 0.797964000  |
| H | 4.951938000  | -1.878058000 | 0.838833000  | H | -4.608912000 | -2.803713000 | 0.335536000  |
| H | 5.683663000  | -1.919159000 | -0.765565000 | H | -6.209090000 | -3.773745000 | -1.296082000 |
| N | 2.363727000  | -2.049302000 | -0.600092000 | H | -5.124088000 | -5.126495000 | -1.600212000 |
| C | 3.604188000  | -3.891227000 | -1.082832000 | C | -1.581172000 | 0.038935000  | 3.063159000  |
| H | 4.472185000  | -4.521112000 | -1.226192000 | C | -2.356700000 | 1.193179000  | 2.397982000  |
| C | 2.270438000  | -4.244340000 | -1.254696000 | C | -2.167120000 | -1.327454000 | 2.657236000  |
| H | 1.895440000  | -5.210867000 | -1.567670000 | H | -1.635504000 | 0.144275000  | 4.155672000  |
| C | 1.497453000  | -3.091817000 | -0.948927000 | C | -3.863791000 | 1.105294000  | 2.681900000  |
| C | 3.612169000  | -2.533738000 | -0.670420000 | H | -2.181292000 | 1.136016000  | 1.316467000  |
| C | 0.122685000  | -2.855311000 | -0.906094000 | H | -1.947908000 | 2.150973000  | 2.741818000  |
| H | -0.180748000 | -1.844264000 | -0.623572000 | C | -3.670825000 | -1.402907000 | 2.960442000  |
| N | -0.355994000 | 3.677698000  | -1.588133000 | H | -1.998320000 | -1.462536000 | 1.580268000  |
| H | -0.080414000 | 4.433652000  | -2.207003000 | H | -1.619489000 | -2.125627000 | 3.171999000  |
| C | -1.718936000 | 3.723767000  | -1.034108000 | C | -4.432960000 | -0.261641000 | 2.269686000  |

|                                            |              |              |              |   |             |              |              |
|--------------------------------------------|--------------|--------------|--------------|---|-------------|--------------|--------------|
| H                                          | -4.384155000 | 1.913255000  | 2.154231000  | C | 0.262642000 | -2.055736000 | -1.458518000 |
| H                                          | -4.044715000 | 1.265560000  | 3.753995000  | H | 0.409074000 | -1.195885000 | -0.798782000 |
| H                                          | -4.062763000 | -2.376162000 | 2.645301000  | N | 0.155010000 | 2.523129000  | -1.443980000 |
| H                                          | -3.828113000 | -1.341369000 | 4.046418000  | N | 1.345979000 | -2.747479000 | -1.770120000 |
| H                                          | -5.500555000 | -0.316509000 | 2.510294000  | N | 0.330075000 | 0.228992000  | 2.653988000  |
| H                                          | -4.344298000 | -0.375061000 | 1.179602000  | H | 0.126562000 | 0.349526000  | 1.603915000  |
|                                            |              |              |              | H | 0.023542000 | 1.684508000  | -0.789839000 |
|                                            |              |              |              | H | 1.270714000 | -3.556318000 | -2.378765000 |
| <sup>7</sup> P <sub>2NHi-O...NO-side</sub> |              |              |              | C | 1.538726000 | 2.851348000  | -1.791954000 |
| Fe                                         | -1.968983000 | 0.131258000  | -0.030082000 | C | 2.273551000 | 3.415696000  | -0.562585000 |
| N                                          | -4.294044000 | -0.365012000 | -0.285933000 | C | 2.245001000 | 1.592186000  | -2.328657000 |
| C                                          | -4.631935000 | -1.274789000 | 0.824440000  | H | 1.520484000 | 3.615105000  | -2.581490000 |
| H                                          | -5.704255000 | -1.249936000 | 1.066790000  | C | 3.755864000 | 3.682676000  | -0.864919000 |
| H                                          | -4.398579000 | -2.294986000 | 0.496419000  | H | 2.188127000 | 2.681634000  | 0.247969000  |
| C                                          | -4.949453000 | 0.955306000  | -0.183365000 | H | 1.769750000 | 4.327973000  | -0.222733000 |
| H                                          | -5.973495000 | 0.941837000  | -0.583630000 | C | 3.725461000 | 1.870701000  | -2.630924000 |
| H                                          | -5.019070000 | 1.199313000  | 0.883488000  | H | 2.162328000 | 0.805038000  | -1.566453000 |
| C                                          | -4.436681000 | -0.996977000 | -1.615971000 | H | 1.720314000 | 1.230730000  | -3.220790000 |
| H                                          | -5.348062000 | -1.607673000 | -1.684855000 | C | 4.452368000 | 2.419799000  | -1.394119000 |
| H                                          | -4.527727000 | -0.194383000 | -2.357314000 | H | 4.256406000 | 4.051739000  | 0.037265000  |
| C                                          | -4.108212000 | 1.983583000  | -0.883116000 | H | 3.837660000 | 4.482420000  | -1.614049000 |
| C                                          | -4.499852000 | 3.138746000  | -1.583491000 | H | 4.211107000 | 0.955806000  | -2.986757000 |
| N                                          | -2.757740000 | 1.850401000  | -0.861853000 | H | 3.799246000 | 2.599989000  | -3.449481000 |
| C                                          | -3.320383000 | 3.744014000  | -2.019688000 | H | 5.500385000 | 2.633554000  | -1.631447000 |
| H                                          | -5.514645000 | 3.474973000  | -1.747651000 | H | 4.456140000 | 1.651395000  | -0.607000000 |
| C                                          | -2.246952000 | 2.938220000  | -1.567187000 | C | 1.701063000 | 0.507294000  | 3.093040000  |
| H                                          | -3.224146000 | 4.652409000  | -2.601095000 | C | 2.685767000 | -0.028134000 | 2.038643000  |
| C                                          | -3.205616000 | -1.806661000 | -1.920007000 | C | 1.902857000 | 2.014110000  | 3.336121000  |
| C                                          | -3.021107000 | -2.936292000 | -2.758593000 | H | 1.868335000 | -0.027275000 | 4.038884000  |
| N                                          | -2.038677000 | -1.414541000 | -1.390545000 | C | 4.140152000 | 0.293511000  | 2.414012000  |
| C                                          | -1.662118000 | -3.234002000 | -2.728829000 | H | 2.438666000 | 0.431531000  | 1.072590000  |
| H                                          | -3.792736000 | -3.456560000 | -3.310439000 | H | 2.539857000 | -1.108343000 | 1.923488000  |
| C                                          | -1.050403000 | -2.277773000 | -1.873566000 | C | 3.358346000 | 2.322040000  | 3.721068000  |
| H                                          | -1.167474000 | -4.040310000 | -3.255902000 | H | 1.631067000 | 2.554305000  | 2.420261000  |
| C                                          | -3.794664000 | -0.965816000 | 2.031216000  | H | 1.212466000 | 2.350525000  | 4.118686000  |
| C                                          | -4.070834000 | -1.235203000 | 3.384757000  | C | 4.341912000 | 1.796146000  | 2.664357000  |
| N                                          | -2.542843000 | -0.470891000 | 1.867328000  | H | 4.810488000 | -0.053313000 | 1.618340000  |
| C                                          | -2.913547000 | -0.906397000 | 4.087976000  | H | 4.415463000 | -0.266720000 | 3.318442000  |
| H                                          | -4.995031000 | -1.632425000 | 3.782062000  | H | 3.483472000 | 3.401734000  | 3.858574000  |
| C                                          | -1.967634000 | -0.440935000 | 3.141087000  | H | 3.583357000 | 1.855518000  | 4.690559000  |
| H                                          | -2.744136000 | -0.993334000 | 5.153846000  | H | 5.374034000 | 1.991282000  | 2.976027000  |
| C                                          | -0.890332000 | 3.203839000  | -1.843373000 | H | 4.188490000 | 2.343202000  | 1.724833000  |
| H                                          | -0.696896000 | 4.076039000  | -2.468570000 | C | 2.683429000 | -2.418714000 | -1.253125000 |
| C                                          | -0.636930000 | -0.112070000 | 3.467931000  | C | 3.241764000 | -3.567221000 | -0.399314000 |
| H                                          | -0.379936000 | -0.198474000 | 4.524136000  |   |             |              |              |

|                                            |              |              |              |   |              |              |              |
|--------------------------------------------|--------------|--------------|--------------|---|--------------|--------------|--------------|
| C                                          | 3.640151000  | -2.043812000 | -2.393923000 | H | 2.310111000  | 3.884779000  | -3.507802000 |
| H                                          | 2.542957000  | -1.541762000 | -0.610632000 | C | 3.482142000  | 0.544517000  | 2.158106000  |
| C                                          | 4.631473000  | -3.205020000 | 0.152189000  | C | 3.682491000  | 0.767082000  | 3.533055000  |
| H                                          | 3.316967000  | -4.470981000 | -1.021475000 | N | 2.213540000  | 0.130882000  | 1.902761000  |
| H                                          | 2.542989000  | -3.789922000 | 0.414440000  | C | 2.472036000  | 0.461128000  | 4.153069000  |
| C                                          | 5.021814000  | -1.671068000 | -1.831060000 | H | 4.600136000  | 1.096261000  | 4.001072000  |
| H                                          | 3.738797000  | -2.899882000 | -3.076764000 | C | 1.567858000  | 0.068078000  | 3.133509000  |
| H                                          | 3.212194000  | -1.217135000 | -2.971481000 | H | 2.248441000  | 0.497869000  | 5.211879000  |
| C                                          | 5.600696000  | -2.806445000 | -0.971804000 | C | 0.198459000  | -3.025474000 | -1.983510000 |
| H                                          | 5.031754000  | -4.048630000 | 0.724583000  | H | -0.099041000 | -3.850728000 | -2.630399000 |
| H                                          | 4.528806000  | -2.368533000 | 0.857230000  | C | 0.261531000  | -0.395049000 | 3.380025000  |
| H                                          | 5.702583000  | -1.422895000 | -2.652651000 | H | -0.005900000 | -0.503933000 | 4.430993000  |
| H                                          | 4.924945000  | -0.762653000 | -1.219123000 | C | 0.276029000  | 2.782374000  | -1.860302000 |
| H                                          | 6.565560000  | -2.505714000 | -0.548807000 | H | -0.007031000 | 3.682834000  | -2.404652000 |
| H                                          | 5.795463000  | -3.679191000 | -1.610606000 | N | -0.697572000 | -2.089350000 | -1.779876000 |
| N                                          | -0.887445000 | -2.954647000 | 1.796364000  | N | -0.649545000 | 2.254291000  | -1.092628000 |
| O                                          | 0.237003000  | -2.740548000 | 1.601918000  | N | -0.659614000 | -0.733291000 | 2.510195000  |
| O                                          | -0.233418000 | 0.465783000  | 0.129162000  | H | -0.484950000 | -0.559097000 | 1.477530000  |
|                                            |              |              |              | H | -0.484034000 | -1.298331000 | -1.103402000 |
|                                            |              |              |              | H | -0.457376000 | 1.337412000  | -0.604005000 |
| <sup>7</sup> P <sub>3NHi-O...NO-side</sub> |              |              |              | C | -2.000279000 | -2.036159000 | -2.450093000 |
| Fe                                         | 1.693807000  | -0.191309000 | -0.077535000 | C | -3.134321000 | -2.148196000 | -1.418739000 |
| N                                          | 4.049113000  | -0.236332000 | -0.066495000 | C | -2.103841000 | -0.731239000 | -3.262467000 |
| C                                          | 4.442897000  | 0.688591000  | 1.014121000  | H | -2.057956000 | -2.889808000 | -3.138877000 |
| H                                          | 5.478259000  | 0.521934000  | 1.344897000  | C | -4.513997000 | -1.996880000 | -2.076903000 |
| H                                          | 4.386835000  | 1.707157000  | 0.612891000  | H | -2.993358000 | -1.362246000 | -0.666660000 |
| C                                          | 4.387460000  | -1.649494000 | 0.200800000  | H | -3.055608000 | -3.107507000 | -0.894498000 |
| H                                          | 5.428633000  | -1.882870000 | -0.063964000 | C | -3.488352000 | -0.585811000 | -3.913671000 |
| H                                          | 4.277753000  | -1.815081000 | 1.278713000  | H | -1.917070000 | 0.112781000  | -2.585554000 |
| C                                          | 4.457205000  | 0.220100000  | -1.408890000 | H | -1.310652000 | -0.711134000 | -4.018657000 |
| H                                          | 5.497064000  | 0.576669000  | -1.425677000 | C | -4.615769000 | -0.687657000 | -2.874501000 |
| H                                          | 4.397989000  | -0.642464000 | -2.082779000 | H | -5.294221000 | -2.042422000 | -1.308512000 |
| C                                          | 3.427734000  | -2.527897000 | -0.549919000 | H | -4.690120000 | -2.847092000 | -2.750642000 |
| C                                          | 3.624475000  | -3.801211000 | -1.116191000 | H | -3.543504000 | 0.368017000  | -4.450339000 |
| N                                          | 2.161281000  | -2.086343000 | -0.754055000 | H | -3.619353000 | -1.374776000 | -4.667541000 |
| C                                          | 2.411341000  | -4.152319000 | -1.708675000 | H | -5.591761000 | -0.620692000 | -3.367645000 |
| H                                          | 4.541477000  | -4.374393000 | -1.099567000 | H | -4.554101000 | 0.164624000  | -2.182980000 |
| C                                          | 1.510500000  | -3.082786000 | -1.477780000 | C | -1.922134000 | -1.378639000 | 2.891373000  |
| H                                          | 2.185398000  | -5.059175000 | -2.255476000 | C | -3.128774000 | -0.536140000 | 2.452899000  |
| C                                          | 3.511296000  | 1.285172000  | -1.880155000 | C | -1.982130000 | -2.794071000 | 2.287044000  |
| C                                          | 3.736381000  | 2.337954000  | -2.788525000 | H | -1.928424000 | -1.462209000 | 3.986551000  |
| N                                          | 2.230783000  | 1.275450000  | -1.436058000 | C | -4.450175000 | -1.230744000 | 2.816136000  |
| C                                          | 2.522357000  | 3.009955000  | -2.906022000 | H | -3.076475000 | -0.396862000 | 1.367807000  |
| H                                          | 4.671107000  | 2.569377000  | -3.280848000 | H | -3.069035000 | 0.458944000  | 2.909068000  |
| C                                          | 1.594508000  | 2.346080000  | -2.062036000 |   |              |              |              |

|                                                       |              |              |              |   |              |              |              |
|-------------------------------------------------------|--------------|--------------|--------------|---|--------------|--------------|--------------|
| C                                                     | -3.311594000 | -3.487413000 | 2.628635000  | H | 5.744660000  | 0.695864000  | -1.720989000 |
| H                                                     | -1.871393000 | -2.709185000 | 1.198605000  | C | 3.735123000  | 1.470629000  | -1.913947000 |
| H                                                     | -1.131041000 | -3.381671000 | 2.650000000  | C | 3.856669000  | 2.624808000  | -2.724756000 |
| C                                                     | -4.522008000 | -2.639267000 | 2.206654000  | H | 4.729962000  | 2.919875000  | -3.290950000 |
| H                                                     | -5.292775000 | -0.619219000 | 2.473787000  | C | 2.638599000  | 3.295065000  | -2.644267000 |
| H                                                     | -4.538550000 | -1.300249000 | 3.909390000  | H | 2.380064000  | 4.222295000  | -3.140002000 |
| H                                                     | -3.345168000 | -4.472024000 | 2.148798000  | C | 1.803293000  | 2.533204000  | -1.786267000 |
| H                                                     | -3.356837000 | -3.667815000 | 3.711822000  | C | 0.495442000  | 2.699655000  | -1.324307000 |
| H                                                     | -5.452362000 | -3.135014000 | 2.504769000  | H | 0.115310000  | 1.899602000  | -0.688058000 |
| H                                                     | -4.544615000 | -2.556355000 | 1.111486000  | C | 4.919612000  | 0.641199000  | 0.815757000  |
| C                                                     | -1.967888000 | 2.884062000  | -0.894611000 | H | 5.972534000  | 0.427391000  | 1.045817000  |
| C                                                     | -2.867140000 | 1.911291000  | -0.127915000 | H | 4.865298000  | 1.680183000  | 0.469849000  |
| C                                                     | -1.850634000 | 4.219256000  | -0.135070000 | N | 2.692122000  | 0.304190000  | 1.845002000  |
| H                                                     | -2.404609000 | 3.076837000  | -1.886006000 | C | 4.049019000  | 0.465495000  | 2.024236000  |
| C                                                     | -4.256401000 | 2.508649000  | 0.128753000  | C | 4.361584000  | 0.536954000  | 3.376282000  |
| H                                                     | -2.378460000 | 1.686183000  | 0.827382000  | C | 3.135632000  | 0.427292000  | 4.069882000  |
| H                                                     | -2.943123000 | 0.966613000  | -0.674233000 | H | 2.989682000  | 0.447413000  | 5.142531000  |
| C                                                     | -3.239220000 | 4.830257000  | 0.112095000  | C | 2.121270000  | 0.286720000  | 3.114858000  |
| H                                                     | -1.348247000 | 4.026135000  | 0.821955000  | H | 5.347778000  | 0.665617000  | 3.801958000  |
| H                                                     | -1.217835000 | 4.918549000  | -0.694665000 | C | 0.718056000  | 0.183275000  | 3.429534000  |
| C                                                     | -4.155371000 | 3.853063000  | 0.866038000  | H | 0.502709000  | 0.198088000  | 4.507164000  |
| H                                                     | -4.860365000 | 1.797528000  | 0.704600000  | C | 4.789722000  | -1.629767000 | -0.160221000 |
| H                                                     | -4.774149000 | 2.653817000  | -0.830075000 | H | 4.958717000  | -1.827412000 | 0.904969000  |
| H                                                     | -3.135198000 | 5.767114000  | 0.670012000  | H | 5.727238000  | -1.859574000 | -0.685277000 |
| H                                                     | -3.699139000 | 5.089229000  | -0.852275000 | N | 2.407569000  | -2.023300000 | -0.588731000 |
| H                                                     | -5.151115000 | 4.290724000  | 0.996996000  | C | 3.667873000  | -3.859575000 | -1.039494000 |
| H                                                     | -3.749434000 | 3.682209000  | 1.873416000  | H | 4.541227000  | -4.485883000 | -1.163327000 |
| N                                                     | 1.720968000  | 2.970852000  | 1.449462000  | C | 2.338518000  | -4.219974000 | -1.234365000 |
| O                                                     | 0.892212000  | 3.068231000  | 2.254367000  | H | 1.974626000  | -5.189664000 | -1.550397000 |
| O                                                     | -0.086027000 | -0.156646000 | -0.043360000 | C | 1.552268000  | -3.072674000 | -0.949004000 |
|                                                       |              |              |              | C | 3.661742000  | -2.503011000 | -0.632492000 |
|                                                       |              |              |              | C | 0.173121000  | -2.853418000 | -0.932339000 |
| <sup>7</sup> P <sub>INH<sub>i</sub>-OH...NO-top</sub> |              |              |              | H | -0.151226000 | -1.845314000 | -0.669059000 |
| Fe                                                    | 2.067927000  | -0.081659000 | -0.014999000 | N | -0.342720000 | 3.689961000  | -1.570973000 |
| N                                                     | 4.416654000  | -0.206204000 | -0.294433000 | H | -0.052626000 | 4.464174000  | -2.160166000 |
| N                                                     | 2.515966000  | 1.408421000  | -1.354054000 | C | -1.713416000 | 3.731064000  | -1.032068000 |
| N                                                     | -0.250053000 | 0.099050000  | 2.583943000  | C | -1.897179000 | 4.909277000  | -0.064322000 |
| H                                                     | -0.041351000 | 0.055517000  | 1.030280000  | C | -2.747005000 | 3.761305000  | -2.167526000 |
| N                                                     | -0.781928000 | -3.734311000 | -1.175814000 | H | -1.837267000 | 2.797826000  | -0.471969000 |
| H                                                     | -0.531841000 | -4.690050000 | -1.409973000 | C | -3.325827000 | 4.912240000  | 0.507034000  |
| O                                                     | 0.239398000  | 0.017868000  | 0.036561000  | H | -1.712609000 | 5.850193000  | -0.602736000 |
| N                                                     | -1.750332000 | 0.176108000  | -1.783992000 | H | -1.154391000 | 4.843283000  | 0.738822000  |
| O                                                     | -2.725264000 | 0.220166000  | -1.155622000 | C | -4.173556000 | 3.766349000  | -1.592165000 |
| C                                                     | 4.703068000  | 0.355521000  | -1.632521000 | H | -2.589886000 | 4.666740000  | -2.771784000 |
| H                                                     | 4.557338000  | -0.446599000 | -2.365951000 |   |              |              |              |

|   |              |              |              |                                        |              |              |              |
|---|--------------|--------------|--------------|----------------------------------------|--------------|--------------|--------------|
| H | -2.591923000 | 2.899837000  | -2.826804000 |                                        |              |              |              |
| C | -4.379603000 | 4.931664000  | -0.611853000 | ${}^6\text{P}_{\text{INH}i\text{-OH}}$ |              |              |              |
| H | -3.454153000 | 5.772042000  | 1.173243000  | Fe                                     | 2.042346000  | 0.069928000  | 0.007535000  |
| H | -3.464867000 | 4.012757000  | 1.123666000  | N                                      | 4.318730000  | -0.026549000 | -0.570508000 |
| H | -4.900567000 | 3.817146000  | -2.409874000 | N                                      | 2.434101000  | 1.907841000  | -0.842129000 |
| H | -4.349928000 | 2.814706000  | -1.071023000 | N                                      | 0.088982000  | -1.000750000 | 2.685877000  |
| H | -5.386528000 | 4.889569000  | -0.182118000 | H                                      | 0.087233000  | -0.252278000 | 1.223092000  |
| H | -4.310489000 | 5.882522000  | -1.158678000 | N                                      | -1.215978000 | -2.580032000 | -2.264915000 |
| C | -2.219528000 | -3.419518000 | -1.129199000 | H                                      | -1.094926000 | -3.337152000 | -2.932420000 |
| C | -2.865530000 | -3.648143000 | -2.504336000 | O                                      | 0.226930000  | 0.208053000  | 0.329323000  |
| C | -2.925011000 | -4.223114000 | -0.025896000 | C                                      | 4.545531000  | 0.951634000  | -1.655418000 |
| H | -2.284689000 | -2.355357000 | -0.881125000 | H                                      | 4.385179000  | 0.434395000  | -2.607827000 |
| C | -4.367644000 | -3.320728000 | -2.461630000 | H                                      | 5.581163000  | 1.316512000  | -1.659902000 |
| H | -2.727937000 | -4.700724000 | -2.792537000 | C                                      | 3.560529000  | 2.081443000  | -1.553261000 |
| H | -2.351671000 | -3.037239000 | -3.255372000 | C                                      | 3.550514000  | 3.340299000  | -2.201688000 |
| C | -4.426253000 | -3.887858000 | 0.006215000  | H                                      | 4.339565000  | 3.737791000  | -2.826994000 |
| H | -2.792518000 | -5.296946000 | -0.222449000 | C                                      | 2.334667000  | 3.943484000  | -1.884422000 |
| H | -2.454813000 | -4.008433000 | 0.940423000  | H                                      | 1.979311000  | 4.916218000  | -2.200523000 |
| C | -5.084325000 | -4.119863000 | -1.362365000 | C                                      | 1.641022000  | 3.047535000  | -1.033659000 |
| H | -4.815895000 | -3.520856000 | -3.440734000 | C                                      | 0.380181000  | 3.084328000  | -0.428218000 |
| H | -4.494272000 | -2.245630000 | -2.269899000 | H                                      | 0.151440000  | 2.246320000  | 0.225710000  |
| H | -4.919709000 | -4.486109000 | 0.779854000  | C                                      | 4.996637000  | 0.337505000  | 0.694618000  |
| H | -4.551903000 | -2.835124000 | 0.295064000  | H                                      | 6.055554000  | 0.047385000  | 0.685438000  |
| H | -6.143529000 | -3.842740000 | -1.323379000 | H                                      | 4.955839000  | 1.430158000  | 0.768969000  |
| H | -5.047342000 | -5.190607000 | -1.607649000 | N                                      | 2.902579000  | -0.392358000 | 1.797530000  |
| C | -1.633237000 | 0.019586000  | 3.031660000  | C                                      | 4.269959000  | -0.285173000 | 1.851345000  |
| C | -2.435716000 | 1.170191000  | 2.390314000  | C                                      | 4.752318000  | -0.763429000 | 3.068215000  |
| C | -2.227538000 | -1.343583000 | 2.622922000  | C                                      | 3.621545000  | -1.179760000 | 3.805198000  |
| H | -1.695534000 | 0.113109000  | 4.130106000  | H                                      | 3.605817000  | -1.608248000 | 4.800406000  |
| C | -3.934991000 | 1.076654000  | 2.710241000  | C                                      | 2.493246000  | -0.946891000 | 3.007178000  |
| H | -2.289192000 | 1.119660000  | 1.302649000  | H                                      | 5.790630000  | -0.798016000 | 3.373478000  |
| H | -2.022725000 | 2.129884000  | 2.724232000  | C                                      | 1.133208000  | -1.233479000 | 3.399716000  |
| C | -3.722961000 | -1.434330000 | 2.960125000  | H                                      | 1.034497000  | -1.676196000 | 4.400343000  |
| H | -2.083835000 | -1.466500000 | 1.539724000  | C                                      | 4.582058000  | -1.421567000 | -0.990513000 |
| H | -1.663360000 | -2.146060000 | 3.112886000  | H                                      | 4.792729000  | -2.000682000 | -0.084444000 |
| C | -4.509758000 | -0.289709000 | 2.302846000  | H                                      | 5.467730000  | -1.493387000 | -1.634188000 |
| H | -4.474410000 | 1.886207000  | 2.203530000  | N                                      | 2.153186000  | -1.520727000 | -1.296005000 |
| H | -4.088390000 | 1.226782000  | 3.787918000  | C                                      | 3.224837000  | -3.041128000 | -2.592061000 |
| H | -4.118850000 | -2.406053000 | 2.643502000  | H                                      | 4.036405000  | -3.593509000 | -3.048048000 |
| H | -3.853930000 | -1.385852000 | 4.050060000  | C                                      | 1.856213000  | -3.220993000 | -2.795404000 |
| H | -5.570492000 | -0.352026000 | 2.571452000  | H                                      | 1.377535000  | -3.940683000 | -3.447568000 |
| H | -4.451809000 | -0.393364000 | 1.209008000  | C                                      | 1.191774000  | -2.269645000 | -1.982770000 |
|   |              |              |              | C                                      | 3.361333000  | -1.988001000 | -1.657822000 |
|   |              |              |              | C                                      | -0.161570000 | -1.988288000 | -1.749456000 |

|   |              |              |              |                                              |              |              |              |
|---|--------------|--------------|--------------|----------------------------------------------|--------------|--------------|--------------|
| H | -0.360337000 | -1.185798000 | -1.039725000 | C                                            | -3.385327000 | -2.557159000 | 2.570663000  |
| N | -0.590572000 | 3.959045000  | -0.584978000 | H                                            | -1.847879000 | -1.906431000 | 1.191593000  |
| H | -0.483101000 | 4.726914000  | -1.241626000 | H                                            | -1.345094000 | -3.248197000 | 2.222589000  |
| C | -1.915055000 | 3.755519000  | 0.041768000  | C                                            | -4.177679000 | -1.242147000 | 2.597150000  |
| C | -2.760190000 | 5.027004000  | -0.070422000 | H                                            | -4.085008000 | 0.714544000  | 3.547517000  |
| C | -2.641109000 | 2.544326000  | -0.576164000 | H                                            | -3.608343000 | -0.626475000 | 4.590899000  |
| H | -1.731677000 | 3.546465000  | 1.103279000  | H                                            | -3.828282000 | -3.257995000 | 1.852733000  |
| C | -4.131991000 | 4.819348000  | 0.592016000  | H                                            | -3.444231000 | -3.033869000 | 3.559952000  |
| H | -2.898400000 | 5.269331000  | -1.133869000 | H                                            | -5.222326000 | -1.430435000 | 2.875725000  |
| H | -2.230994000 | 5.868823000  | 0.392160000  | H                                            | -4.189490000 | -0.807212000 | 1.586678000  |
| C | -4.006536000 | 2.335493000  | 0.094217000  |                                              |              |              |              |
| H | -2.774304000 | 2.726616000  | -1.651540000 |                                              |              |              |              |
| H | -2.021295000 | 1.646784000  | -0.469638000 | <sup>6</sup> P <sub>2NH<sub>i</sub>-OH</sub> |              |              |              |
| C | -4.868183000 | 3.604103000  | 0.005789000  | Fe                                           | -2.029908000 | -0.020575000 | -0.037368000 |
| H | -4.736390000 | 5.726679000  | 0.474576000  | N                                            | -4.271386000 | 0.581994000  | -0.173601000 |
| H | -3.989306000 | 4.668937000  | 1.671683000  | C                                            | -4.655923000 | 0.451682000  | -1.591542000 |
| H | -4.519900000 | 1.485942000  | -0.374031000 | H                                            | -5.737651000 | 0.304724000  | -1.705636000 |
| H | -3.852246000 | 2.069104000  | 1.150380000  | H                                            | -4.401815000 | 1.395114000  | -2.087675000 |
| H | -5.821821000 | 3.453673000  | 0.526963000  | C                                            | -4.948022000 | -0.402294000 | 0.701882000  |
| H | -5.107267000 | 3.802106000  | -1.049189000 | H                                            | -5.965847000 | -0.082812000 | 0.961001000  |
| C | -2.596804000 | -2.202238000 | -1.929596000 | H                                            | -5.029585000 | -1.330317000 | 0.124411000  |
| C | -3.321061000 | -1.630403000 | -3.157494000 | C                                            | -4.370492000 | 1.974587000  | 0.319030000  |
| C | -3.355078000 | -3.394877000 | -1.329140000 | H                                            | -5.271472000 | 2.473426000  | -0.058973000 |
| H | -2.518497000 | -1.416502000 | -1.170088000 | H                                            | -4.454837000 | 1.931332000  | 1.410267000  |
| C | -4.759341000 | -1.229999000 | -2.792640000 | C                                            | -4.111596000 | -0.616901000 | 1.926316000  |
| H | -3.337202000 | -2.392379000 | -3.949841000 | C                                            | -4.486951000 | -0.857270000 | 3.246550000  |
| H | -2.761645000 | -0.768808000 | -3.540924000 | N                                            | -2.745646000 | -0.588097000 | 1.803815000  |
| C | -4.796317000 | -2.994421000 | -0.976606000 | C                                            | -3.287489000 | -0.980549000 | 3.979091000  |
| H | -3.367029000 | -4.215380000 | -2.060613000 | H                                            | -5.501329000 | -0.925648000 | 3.618961000  |
| H | -2.823754000 | -3.752565000 | -0.439510000 | C                                            | -2.226629000 | -0.807905000 | 3.078206000  |
| C | -5.533913000 | -2.412244000 | -2.191187000 | H                                            | -3.180461000 | -1.162169000 | 5.042058000  |
| H | -5.272840000 | -0.844721000 | -3.681772000 | C                                            | -3.121844000 | 2.721225000  | -0.052448000 |
| H | -4.726966000 | -0.408622000 | -2.061318000 | C                                            | -2.890459000 | 4.101999000  | -0.247269000 |
| H | -5.333242000 | -3.863995000 | -0.578491000 | N                                            | -1.974257000 | 2.029276000  | -0.174406000 |
| H | -4.771518000 | -2.242643000 | -0.176170000 | C                                            | -1.524540000 | 4.247597000  | -0.493864000 |
| H | -6.544109000 | -2.095421000 | -1.903219000 | H                                            | -3.639121000 | 4.882587000  | -0.206368000 |
| H | -5.649381000 | -3.194727000 | -2.955374000 | C                                            | -0.957771000 | 2.950532000  | -0.445941000 |
| C | -1.249989000 | -1.300282000 | 3.170205000  | H                                            | -0.987505000 | 5.167506000  | -0.688518000 |
| C | -2.063690000 | 0.009814000  | 3.214041000  | C                                            | -3.880585000 | -0.654698000 | -2.240874000 |
| C | -1.913565000 | -2.309546000 | 2.212409000  | C                                            | -4.219809000 | -1.417867000 | -3.371479000 |
| H | -1.218849000 | -1.735926000 | 4.183695000  | N                                            | -2.627320000 | -0.944712000 | -1.804401000 |
| C | -3.537601000 | -0.236674000 | 3.565113000  | C                                            | -3.103880000 | -2.205470000 | -3.656976000 |
| H | -1.998916000 | 0.485349000  | 2.224692000  | H                                            | -5.159099000 | -1.374413000 | -3.907070000 |
| H | -1.601123000 | 0.699396000  | 3.931503000  | C                                            | -2.120630000 | -1.906274000 | -2.685121000 |
|   |              |              |              | H                                            | -2.981653000 | -2.914386000 | -4.466731000 |

|   |              |              |              |                                 |              |              |              |
|---|--------------|--------------|--------------|---------------------------------|--------------|--------------|--------------|
| C | -0.835996000 | -0.819960000 | 3.460298000  | H                               | 5.251771000  | -3.517902000 | -0.887455000 |
| H | -0.670622000 | -0.944765000 | 4.538886000  | H                               | 4.096490000  | -2.695754000 | 0.163149000  |
| C | -0.818849000 | -2.450484000 | -2.718419000 | C                               | 2.777334000  | 2.559115000  | -0.942340000 |
| H | -0.611777000 | -3.141185000 | -3.533096000 | C                               | 3.362882000  | 2.754428000  | -2.348341000 |
| C | 0.353208000  | 2.475245000  | -0.592887000 | C                               | 3.708872000  | 3.119315000  | 0.141332000  |
| H | 0.484859000  | 1.401431000  | -0.470234000 | H                               | 2.635665000  | 1.487278000  | -0.764773000 |
| N | 0.169320000  | -0.696607000 | 2.665899000  | C                               | 4.756302000  | 2.113135000  | -2.444307000 |
| N | 1.442539000  | 3.166430000  | -0.841636000 | H                               | 3.435926000  | 3.830898000  | -2.558196000 |
| N | 0.173162000  | -2.194904000 | -1.906089000 | H                               | 2.681937000  | 2.319676000  | -3.089750000 |
| H | 0.019061000  | -1.550290000 | -1.099208000 | C                               | 5.096628000  | 2.468130000  | 0.041017000  |
| H | 0.002440000  | -0.575862000 | 1.070432000  | H                               | 3.798879000  | 4.206641000  | 0.007932000  |
| H | 1.386146000  | 4.175276000  | -0.956316000 | H                               | 3.265006000  | 2.943290000  | 1.127453000  |
| C | 1.532678000  | -0.702023000 | 3.178818000  | C                               | 5.700160000  | 2.652535000  | -1.359212000 |
| C | 2.275171000  | -1.932455000 | 2.625212000  | H                               | 5.175615000  | 2.290080000  | -3.442113000 |
| C | 2.243296000  | 0.591472000  | 2.733746000  | H                               | 4.657431000  | 1.024489000  | -2.328978000 |
| H | 1.535585000  | -0.749948000 | 4.281314000  | H                               | 5.759214000  | 2.889987000  | 0.806504000  |
| C | 3.759003000  | -1.935009000 | 3.018188000  | H                               | 5.003889000  | 1.394601000  | 0.257841000  |
| H | 2.188556000  | -1.913840000 | 1.530763000  | H                               | 6.673502000  | 2.150025000  | -1.421280000 |
| H | 1.776268000  | -2.846091000 | 2.972442000  | H                               | 5.879992000  | 3.722927000  | -1.536328000 |
| C | 3.727592000  | 0.592075000  | 3.127868000  | O                               | -0.233405000 | -0.444865000 | 0.082482000  |
| H | 2.152975000  | 0.673462000  | 1.640983000  |                                 |              |              |              |
| H | 1.725282000  | 1.458798000  | 3.162407000  | ${}^6\text{P}_{3\text{NHi-OH}}$ |              |              |              |
| C | 4.452821000  | -0.640899000 | 2.569565000  | Fe                              | 1.826514000  | -0.000450000 | 0.019190000  |
| H | 4.256094000  | -2.809456000 | 2.579667000  | N                               | 4.123645000  | 0.004303000  | 0.041328000  |
| H | 3.847196000  | -2.033429000 | 4.109919000  | C                               | 4.529036000  | 0.796663000  | -1.137439000 |
| H | 4.206416000  | 1.511417000  | 2.770023000  | H                               | 5.570136000  | 1.134796000  | -1.060721000 |
| H | 3.812231000  | 0.594495000  | 4.224317000  | H                               | 4.459729000  | 0.141758000  | -2.012749000 |
| H | 5.503967000  | -0.640855000 | 2.884799000  | C                               | 4.491331000  | 0.634940000  | 1.327827000  |
| H | 4.449452000  | -0.594015000 | 1.470336000  | H                               | 5.533273000  | 0.419945000  | 1.597766000  |
| C | 1.534698000  | -2.726475000 | -2.023360000 | H                               | 4.404084000  | 1.718577000  | 1.191446000  |
| C | 2.535707000  | -1.565248000 | -1.872233000 | C                               | 4.528546000  | -1.413569000 | -0.047338000 |
| C | 1.773817000  | -3.813909000 | -0.961386000 | H                               | 5.573634000  | -1.517590000 | -0.365239000 |
| H | 1.639136000  | -3.168114000 | -3.021129000 | H                               | 4.445662000  | -1.840366000 | 0.958034000  |
| C | 3.984364000  | -2.071301000 | -1.901132000 | C                               | 3.540048000  | 0.156146000  | 2.381305000  |
| H | 2.345693000  | -1.059993000 | -0.915474000 | C                               | 3.732353000  | -0.046263000 | 3.745618000  |
| H | 2.362896000  | -0.827070000 | -2.664959000 | N                               | 2.250585000  | -0.145961000 | 2.018511000  |
| C | 3.228389000  | -4.307833000 | -0.988303000 | C                               | 2.496310000  | -0.498725000 | 4.252735000  |
| H | 1.543014000  | -3.394619000 | 0.026489000  | H                               | 4.655211000  | 0.110207000  | 4.289600000  |
| H | 1.076419000  | -4.642821000 | -1.132668000 | C                               | 1.597971000  | -0.557970000 | 3.177764000  |
| C | 4.221033000  | -3.146074000 | -0.831118000 | H                               | 2.264986000  | -0.773521000 | 5.275024000  |
| H | 4.669191000  | -1.227248000 | -1.753078000 | C                               | 3.598952000  | -2.121344000 | -0.984332000 |
| H | 4.203544000  | -2.490071000 | -2.893748000 | C                               | 3.836658000  | -3.228630000 | -1.816927000 |
| H | 3.378034000  | -5.051184000 | -0.195586000 | N                               | 2.320090000  | -1.680657000 | -1.101653000 |
| H | 3.418006000  | -4.818035000 | -1.943784000 | C                               | 2.637824000  | -3.473881000 | -2.487988000 |

|   |              |              |              |                                             |              |              |              |
|---|--------------|--------------|--------------|---------------------------------------------|--------------|--------------|--------------|
| H | 4.773898000  | -3.760797000 | -1.912734000 | H                                           | -2.891776000 | 1.361691000  | -0.399515000 |
| C | 1.703963000  | -2.509826000 | -2.041037000 | H                                           | -2.904682000 | 2.602588000  | -1.654498000 |
| H | 2.435602000  | -4.240300000 | -3.225940000 | C                                           | -3.400300000 | 3.462580000  | 2.178306000  |
| C | 3.589752000  | 1.952917000  | -1.287423000 | H                                           | -1.854165000 | 1.960339000  | 1.938598000  |
| C | 3.826203000  | 3.233055000  | -1.816047000 | H                                           | -1.222146000 | 3.592040000  | 2.182491000  |
| N | 2.305112000  | 1.819471000  | -0.867291000 | C                                           | -4.526270000 | 2.727097000  | 1.435898000  |
| C | 2.620204000  | 3.926570000  | -1.705823000 | H                                           | -5.169072000 | 2.329121000  | -0.606279000 |
| H | 4.767453000  | 3.592032000  | -2.210954000 | H                                           | -4.532856000 | 3.954044000  | -0.346854000 |
| C | 1.683933000  | 3.045406000  | -1.115639000 | H                                           | -3.478894000 | 3.292883000  | 3.259332000  |
| H | 2.414922000  | 4.949804000  | -1.995405000 | H                                           | -3.507839000 | 4.544917000  | 2.016796000  |
| C | 0.248413000  | -1.047566000 | 3.289141000  | H                                           | -5.503388000 | 3.096724000  | 1.771480000  |
| H | -0.005516000 | -1.411428000 | 4.293823000  | H                                           | -4.485847000 | 1.657966000  | 1.683818000  |
| C | 0.368140000  | 3.425310000  | -0.785268000 | C                                           | -1.848624000 | -1.439632000 | -2.839752000 |
| H | 0.109825000  | 4.464415000  | -0.975770000 | C                                           | -2.979317000 | -1.719155000 | -1.838212000 |
| C | 0.395883000  | -2.402202000 | -2.553414000 | C                                           | -1.972467000 | -0.029471000 | -3.442934000 |
| H | 0.141221000  | -3.084388000 | -3.361389000 | H                                           | -1.886571000 | -2.182771000 | -3.644729000 |
| N | -0.629968000 | -1.105388000 | 2.348497000  | C                                           | -4.356566000 | -1.508223000 | -2.484039000 |
| N | -0.544196000 | -1.570410000 | -2.181746000 | H                                           | -2.865653000 | -1.041649000 | -0.982005000 |
| N | -0.574534000 | 2.682186000  | -0.264622000 | H                                           | -2.882258000 | -2.741377000 | -1.454879000 |
| H | -0.394579000 | 1.667568000  | -0.106336000 | C                                           | -3.354480000 | 0.183801000  | -4.079210000 |
| H | -0.362715000 | -0.419489000 | 0.868335000  | H                                           | -1.816162000 | 0.705387000  | -2.642580000 |
| H | -0.372795000 | -0.935520000 | -1.374347000 | H                                           | -1.175951000 | 0.119396000  | -4.181918000 |
| C | -1.925177000 | -1.720221000 | 2.619187000  | C                                           | -4.486969000 | -0.099632000 | -3.080838000 |
| C | -3.053585000 | -0.724058000 | 2.304945000  | H                                           | -5.141132000 | -1.683770000 | -1.737695000 |
| C | -2.061862000 | -2.989684000 | 1.756928000  | H                                           | -4.500010000 | -2.254211000 | -3.278976000 |
| H | -1.999238000 | -2.009584000 | 3.681594000  | H                                           | -3.427254000 | 1.209654000  | -4.461125000 |
| C | -4.440233000 | -1.365843000 | 2.449713000  | H                                           | -3.459351000 | -0.486365000 | -4.944546000 |
| H | -2.919852000 | -0.360290000 | 1.277321000  | H                                           | -5.460992000 | 0.014566000  | -3.572957000 |
| H | -2.961189000 | 0.147569000  | 2.964291000  | H                                           | -4.449042000 | 0.640451000  | -2.270307000 |
| C | -3.449399000 | -3.630737000 | 1.900417000  | O                                           | -0.043127000 | 0.015070000  | 0.001390000  |
| H | -1.886883000 | -2.711488000 | 0.709249000  |                                             |              |              |              |
| H | -1.273930000 | -3.700621000 | 2.036808000  | <sup>6</sup> P <sub>3NH<sub>i</sub>-O</sub> |              |              |              |
| C | -4.567336000 | -2.626432000 | 1.581482000  | Fe                                          | -1.748630000 | 0.026584000  | -0.075448000 |
| H | -5.215209000 | -0.636094000 | 2.182297000  | N                                           | -4.105019000 | 0.107791000  | -0.114036000 |
| H | -4.606768000 | -1.634553000 | 3.503116000  | C                                           | -4.460262000 | 0.241883000  | -1.538889000 |
| H | -3.522758000 | -4.506832000 | 1.243382000  | H                                           | -5.513501000 | -0.007798000 | -1.725714000 |
| H | -3.575022000 | -3.995309000 | 2.930551000  | H                                           | -4.319664000 | 1.294240000  | -1.810402000 |
| H | -5.549864000 | -3.092629000 | 1.729244000  | C                                           | -4.535775000 | -1.173401000 | 0.480967000  |
| H | -4.504585000 | -2.341714000 | 0.522214000  | H                                           | -5.586694000 | -1.146415000 | 0.798439000  |
| C | -1.884871000 | 3.181959000  | 0.164075000  | H                                           | -4.448636000 | -1.940701000 | -0.296002000 |
| C | -3.007436000 | 2.438959000  | -0.575501000 | C                                           | -4.495885000 | 1.274411000  | 0.696322000  |
| C | -2.014426000 | 3.017044000  | 1.688148000  | H                                           | -5.505486000 | 1.627395000  | 0.446643000  |
| H | -1.928690000 | 4.247385000  | -0.090009000 | H                                           | -4.516722000 | 0.954489000  | 1.744210000  |
| C | -4.388620000 | 2.896144000  | -0.083891000 | C                                           | -3.629979000 | -1.502703000 | 1.631546000  |



|   |              |              |              |   |             |              |              |
|---|--------------|--------------|--------------|---|-------------|--------------|--------------|
| C | -3.913852000 | -2.178249000 | 2.834558000  | H | 4.480255000 | -1.023206000 | 3.793714000  |
| N | -2.333114000 | -1.113632000 | 1.581810000  | H | 3.583279000 | 2.651843000  | 3.353707000  |
| C | -2.722838000 | -2.192817000 | 3.562653000  | H | 3.561866000 | 1.332415000  | 4.524356000  |
| H | -4.874541000 | -2.584707000 | 3.123296000  | H | 5.536130000 | 1.092491000  | 3.042079000  |
| C | -1.750618000 | -1.527992000 | 2.777090000  | H | 4.502779000 | 1.131996000  | 1.612671000  |
| H | -2.550247000 | -2.611547000 | 4.546686000  | C | 1.772672000 | -2.818044000 | -1.792419000 |
| C | -3.483346000 | 2.368721000  | 0.537192000  | C | 2.984343000 | -1.878274000 | -1.864017000 |
| C | -3.651585000 | 3.757180000  | 0.716348000  | C | 1.794230000 | -3.655040000 | -0.501463000 |
| N | -2.200137000 | 2.060303000  | 0.234932000  | H | 1.792127000 | -3.493230000 | -2.656101000 |
| C | -2.397097000 | 4.328190000  | 0.514795000  | C | 4.299662000 | -2.660417000 | -1.740742000 |
| H | -4.580431000 | 4.257161000  | 0.958504000  | H | 2.915592000 | -1.158720000 | -1.042004000 |
| C | -1.503767000 | 3.269602000  | 0.213653000  | H | 2.952548000 | -1.306913000 | -2.799402000 |
| H | -2.129386000 | 5.376919000  | 0.557805000  | C | 3.115273000 | -4.428152000 | -0.365953000 |
| C | -3.545924000 | -0.625680000 | -2.352068000 | H | 1.668529000 | -2.979475000 | 0.354672000  |
| C | -3.797315000 | -1.308755000 | -3.558097000 | H | 0.939554000 | -4.342231000 | -0.502105000 |
| N | -2.281856000 | -0.842281000 | -1.916251000 | C | 4.331011000 | -3.492532000 | -0.450553000 |
| C | -2.620058000 | -1.989188000 | -3.870103000 | H | 5.144377000 | -1.960594000 | -1.766464000 |
| H | -4.729830000 | -1.304843000 | -4.107502000 | H | 4.410226000 | -3.327330000 | -2.608071000 |
| C | -1.688480000 | -1.695933000 | -2.844238000 | H | 3.121831000 | -4.981022000 | 0.581548000  |
| H | -2.432389000 | -2.638031000 | -4.716903000 | H | 3.178508000 | -5.174853000 | -1.170658000 |
| C | -0.430851000 | -1.271038000 | 3.200291000  | H | 5.259621000 | -4.074556000 | -0.396502000 |
| H | -0.179247000 | -1.581950000 | 4.212148000  | H | 4.326680000 | -2.815171000 | 0.414236000  |
| C | -0.407516000 | -2.275647000 | -2.763530000 | C | 2.136782000 | 2.870725000  | -0.779668000 |
| H | -0.166127000 | -3.005303000 | -3.533542000 | C | 2.898811000 | 1.556812000  | -0.968259000 |
| C | -0.148233000 | 3.464604000  | -0.103882000 | C | 2.209471000 | 3.724996000  | -2.057894000 |
| H | 0.194625000  | 4.496736000  | -0.099970000 | H | 2.586255000 | 3.432592000  | 0.050432000  |
| N | 0.521028000  | -0.686391000 | 2.517574000  | C | 4.356475000 | 1.804150000  | -1.371040000 |
| N | 0.743188000  | 2.553294000  | -0.412339000 | H | 2.395377000 | 0.976160000  | -1.751460000 |
| N | 0.520044000  | -2.056740000 | -1.864344000 | H | 2.850137000 | 0.966328000  | -0.049516000 |
| H | 0.360950000  | -1.319506000 | -1.130916000 | C | 3.670089000 | 3.983969000  | -2.458116000 |
| H | 0.347264000  | -0.410691000 | 1.515909000  | H | 1.691674000 | 3.184805000  | -2.862543000 |
| H | 0.476767000  | 1.538821000  | -0.353642000 | H | 1.681245000 | 4.674273000  | -1.910840000 |
| C | 1.841928000  | -0.353199000 | 3.058655000  | C | 4.444768000 | 2.669572000  | -2.636170000 |
| C | 2.934556000  | -1.105569000 | 2.283879000  | H | 4.860147000 | 0.841350000  | -1.524412000 |
| C | 2.046916000  | 1.170841000  | 2.989373000  | H | 4.879477000 | 2.309104000  | -0.546167000 |
| H | 1.860518000  | -0.670971000 | 4.107731000  | H | 3.698992000 | 4.575627000  | -3.381202000 |
| C | 4.338514000  | -0.698165000 | 2.752918000  | H | 4.155626000 | 4.587258000  | -1.677532000 |
| H | 2.822565000  | -0.881268000 | 1.216724000  | H | 5.493150000 | 2.876773000  | -2.884738000 |
| H | 2.783922000  | -2.185401000 | 2.400178000  | H | 4.018140000 | 2.112323000  | -3.482865000 |
| C | 3.455713000  | 1.566973000  | 3.455366000  | O | 0.026855000 | -0.051574000 | -0.078448000 |
| H | 1.893679000  | 1.498506000  | 1.953329000  |   |             |              |              |
| H | 1.280989000  | 1.665083000  | 3.599318000  |   |             |              |              |
| C | 4.541704000  | 0.821369000  | 2.665828000  |   |             |              |              |
| H | 5.090865000  | -1.222471000 | 2.150639000  |   |             |              |              |
